# Supplementary material for: Efficient one-pot quinoline derivative synthesis from acetophenone and allyl alcohols
Source: Royal Society of Chemistry journal article supplement (doi:10.1039/d5ra09229a), 2026-01-01

## Supporting Information

### Efficient One-Pot Quinoline Derivative Synthesis from Acetophenone and Allyl Alcohols

|                                                            |   |
|------------------------------------------------------------|---|
| 1. General Information .....                               | 1 |
| 2. Experimental Section .....                              | 1 |
| 2.1. Preliminary optimization of reaction conditions ..... | 1 |
| 2.2. Synthesis and characterization of products 3 .....    | 2 |
| 2.2.1 Preparation of quinoline products (Method A) .....   | 2 |
| 2.3. Competitive Experiment .....                          | 2 |
| 2.4. Rearrangement reactions .....                         | 3 |
| 2.5. Synthesis of 3a with 5a .....                         | 3 |
| 3. Experimental data for described substances .....        | 4 |
| 4. Copies of <sup>1</sup> H and <sup>13</sup> C NMR .....  | 9 |

## 1. General Information

Catalytic reactions were carried out in Schlenk tubes using pre-dried glassware. Various products (quinoline) were synthesized according to previously described procedures. Commercially available reagents, such as Catalysts and substrates 1 were purchased from Energy Chemical, and used without purification unless otherwise noted. Column chromatography purification was performed using 200–300 mesh silica gel. NMR spectra were mostly recorded for <sup>1</sup>H NMR at 400 MHz and for <sup>13</sup>C NMR at 101 MHz. CDCl<sub>3</sub> and DMSO-D<sub>6</sub> were used as solvents. Chemical shifts were referenced relative to residual solvent signal (CDCl<sub>3</sub>: <sup>1</sup>H NMR: δ 7.26 ppm, <sup>13</sup>C NMR: δ 77.16 ppm; DMSO-D<sub>6</sub>: <sup>1</sup>H NMR: δ 2.50 ppm, <sup>13</sup>C NMR: δ 39.52 ppm). The following abbreviations are used to describe peak patterns where appropriate: br = broad, s = singlet, d = doublet, t = triplet, q = quartet, m = multiplet. Coupling constants (J) are reported in Hertz (Hz). HRMS was performed on Agilent Technologies 6224 TOF LC/MS apparatus (ESI).

## 2. Experimental Section

### 2.1. Preliminary optimization of reaction conditions

Table S1. Reaction condition screening of 3a.

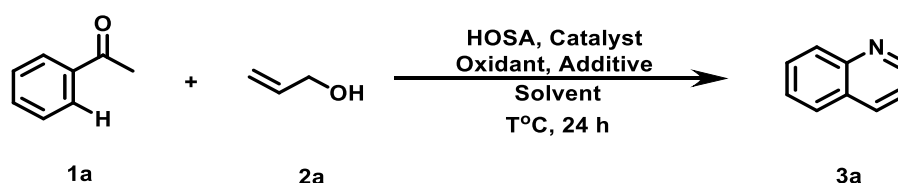

| Entry | Catalyst                                             | Oxidant                         | Solvent             | T(°C)        | Additive             | Yield (%) <sup>b</sup> |
|-------|------------------------------------------------------|---------------------------------|---------------------|--------------|----------------------|------------------------|
| 1     | [Cp*RhCl <sub>2</sub> ] <sub>2</sub>                 | AgSbF <sub>6</sub>              | MeCN:HFIP=1:2       | 120°C        | Cu(OAc) <sub>2</sub> | 30                     |
| 2     | [RuCl <sub>2</sub> ( <i>p</i> -cymene)] <sub>2</sub> | AgSbF <sub>6</sub>              | MeCN:HFIP=1:2       | 120°C        | Cu(OAc) <sub>2</sub> | 45                     |
| 3     | [Cp*IrCl <sub>2</sub> ] <sub>2</sub>                 | AgSbF <sub>6</sub>              | MeCN:HFIP=1:2       | 120°C        | Cu(OAc) <sub>2</sub> | NR                     |
| 4     | [Cp*RuCl <sub>2</sub> ] <sub>2</sub>                 | AgSbF <sub>6</sub>              | MeCN:HFIP=1:2       | 120°C        | Cu(OAc) <sub>2</sub> | NR                     |
| 5     | Cp*CoCOI <sub>2</sub>                                | AgSbF <sub>6</sub>              | MeCN:HFIP=1:2       | 120°C        | Cu(OAc) <sub>2</sub> | NR                     |
| 6     | [RuCl <sub>2</sub> ( <i>p</i> -cymene)] <sub>2</sub> | Ag <sub>2</sub> O               | MeCN:HFIP=1:2       | 120°C        | Cu(OAc) <sub>2</sub> | NR                     |
| 7     | [RuCl <sub>2</sub> ( <i>p</i> -cymene)] <sub>2</sub> | Ag <sub>2</sub> CO <sub>3</sub> | MeCN:HFIP=1:2       | 120°C        | Cu(OAc) <sub>2</sub> | 26                     |
| 8     | [RuCl <sub>2</sub> ( <i>p</i> -cymene)] <sub>2</sub> | AgSbF <sub>6</sub>              | MeCN:DMF=1:2        | 120°C        | Cu(OAc) <sub>2</sub> | NR                     |
| 9     | [RuCl <sub>2</sub> ( <i>p</i> -cymene)] <sub>2</sub> | AgSbF <sub>6</sub>              | MeCN:MeOH=1:2       | 120°C        | Cu(OAc) <sub>2</sub> | 48                     |
| 10    | [RuCl <sub>2</sub> ( <i>p</i> -cymene)] <sub>2</sub> | AgSbF <sub>6</sub>              | <b>MeCN:DCE=1:2</b> | <b>120°C</b> | Cu(OAc) <sub>2</sub> | <b>85</b>              |
| 11    | [RuCl <sub>2</sub> ( <i>p</i> -cymene)] <sub>2</sub> | AgSbF <sub>6</sub>              | MeCN:DCE=1:2        | 100°C        | Cu(OAc) <sub>2</sub> | 36                     |
| 12    | [RuCl <sub>2</sub> ( <i>p</i> -cymene)] <sub>2</sub> | AgSbF <sub>6</sub>              | MeCN:DCE=1:2        | 110°C        | Cu(OAc) <sub>2</sub> | 77                     |
| 13    | [RuCl <sub>2</sub> ( <i>p</i> -cymene)] <sub>2</sub> | AgSbF <sub>6</sub>              | MeCN:DCE=1:2        | 130°C        | Cu(OAc) <sub>2</sub> | 83                     |
| 14    | [RuCl <sub>2</sub> ( <i>p</i> -cymene)] <sub>2</sub> | AgSbF <sub>6</sub>              | MeCN:DCE=1:2        | 120°C        | AcOH                 | 30                     |
| 15    | [RuCl <sub>2</sub> ( <i>p</i> -cymene)] <sub>2</sub> | AgSbF <sub>6</sub>              | MeCN:DCE=1:2        | 120°C        | NaOAc                | 45                     |
| 16    | [RuCl <sub>2</sub> ( <i>p</i> -cymene)] <sub>2</sub> | AgSbF <sub>6</sub>              | MeCN:DCE=1:2        | 120°C        | CsOAc                | 50                     |

<sup>a</sup>Reaction conditions: **1** (0.5 mmol), **2** (0.75 mmol), HOSA (1.0 mmol), Catalyst (5.0 mol %), Oxidant (1.0 mmol), Additive (2 mmol), in the solvent (3.0 mL) for 24 h. <sup>b</sup>Yields of isolated products.

## 2.2. Synthesis and characterization of products 3

### 2.2.1 Preparation of quinoline products (Method A)

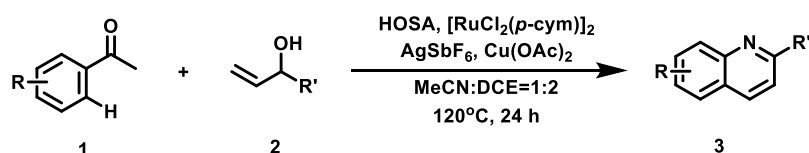

A reaction tube (10 mL) with magnetic stir bar was charged with compound **1** (0.5 mmol, 1.0 equiv), HOSA (1.0 mmol) and 1 mL MeCN. Then the mixture was stirred at room temperature for 3 h. TLC (PE: EA= 4:1) showed that the complete consumption of compound **1**. Then compound **2** (0.625 mmol), [RuCl<sub>2</sub>(*p*-cym)]<sub>2</sub> (0.025 mmol, 5 mol%), AgSbF<sub>6</sub> (0.25 mmol, 0.5 equiv), Cu(OAc)<sub>2</sub> (1.0 mmol, 2.0 equiv) and 2 mL DCE was added. The reaction system was stirred at 120 °C for 24 h. Then the solvent was removed under reduced pressure. The residue was purified by silica gel column chromatography to afford product **3**.

## 2.3. Competitive Experiment

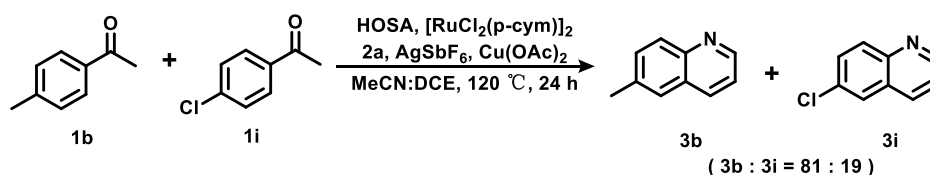

A reaction tube (10 mL) with magnetic stir bar was charged with compound **1b** ( 67.1 mg), HOSA ( 113.1 mg) and 1.0 mL MeCN. Then the mixture was stirred at room temperature for 3h. Another reaction tube (10 mL) with magnetic stir bar was charged with compound **1i** ( 77.3 mg), HOSA( 113.1 mg) and 1.0 mL MeCN. Then the mixture was stirred at room temperature for 3h. TLC (PET: EtOAc= 4:1) showed that the complete consumption of compound **1b** and **1i**. Then compound **2a** ( 58.1 mg), [RuCl<sub>2</sub>(p-cym)]<sub>2</sub> (0.025mmol, 5 mol%), AgSbF<sub>6</sub> (0.25 mmol, 0.5 equiv), Cu(OAc)<sub>2</sub> (1.0 mmol, 2.0 equiv) and 4mL DCE was added, The reaction system was stirred at 120 °C for 24h.

After cooling to room temperature, TLC (PET: EtOAc= 4:1 ) showed that the reaction was complete. Then the solvent was removed under reduced pressure. The residue was purified by silica gel column chromatography to afford **3b** as yellow oil 58.0 mg and **3j** as yellow oil 15.5 mg.

## 2.4. Rrearrangement reactions

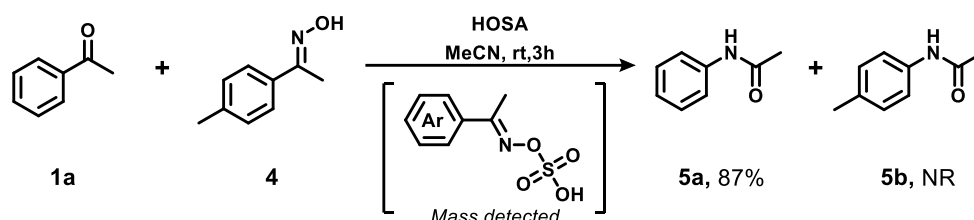

A reaction tube (10 mL) with magnetic stir bar was charged with compound **1a** ( 60.1 mg), **4** ( 74.6 mg), HOSA( 113.1 mg) and 2.0 mL MeCN. Then the mixture was stirred at room temperature for 3h. TLC (PET: EtOAc= 4:1 ) showed that the reaction was complete. Then the solvent was removed under reduced pressure. The residue was purified by silica gel column chromatography to afford **5a** as white solids ( 58.8 mg). **N-phenylacetamide(5a)**: <sup>1</sup>H NMR (400 MHz, CDCl<sub>3</sub>) δ 7.75 (s, 1H), 7.50 (d, *J* = 8.1 Hz, 2H), 7.30 (t, *J* = 7.7 Hz, 2H), 7.09 (t, *J* = 7.4 Hz, 1H), 2.15 (s, 3H). <sup>13</sup>C NMR (101 MHz, CDCl<sub>3</sub>) δ 168.83, 138.05, 129.05, 124.41, 120.12, 24.61. HRMS (ESI) *m/z* calcd for C<sub>8</sub>H<sub>10</sub>NO [M+H]<sup>+</sup> 136.0757, found 136.0758.

## 2.5. Synthesis of 3a with 5a

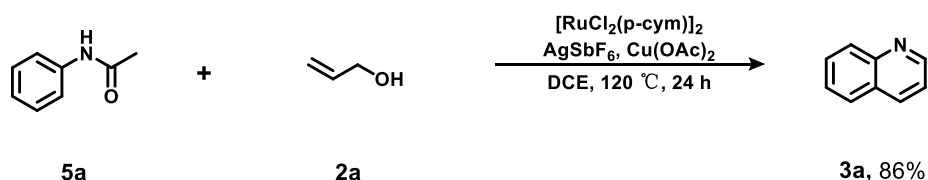

A reaction tube (10 mL) with magnetic stir bar was charged with compound **5a** (0.5 mmol, 1.0 equiv), compound **2a** (43.6mg), [RuCl<sub>2</sub>(p-cym)]<sub>2</sub> (0.025mmol, 5 mol%), AgSbF<sub>6</sub> (0.25 mmol, 0.5 equiv), Cu(OAc)<sub>2</sub> (1.0 mmol, 2.0 equiv) and 2 mL DCE was added, The reaction system was stirred at 120 °C for 24h. After cooling to room temperature, TLC (PE: EA= 4:1 ) showed that the reaction was complete. Then the solvent was removed under reduced pressure. The residue was purified by silica gel column chromatography to afford product **3a** as yellow oil ( 88.8 mg) in 86 % yield.

### 3. Experimental data for described substances

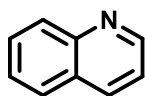

**quinoline(3a):** The title compound was obtained by column chromatography (PE:EA = 20:1) as yellow oil (54.9 mg) in 85 % yield according to the Method A.  $^1\text{H}$  NMR (400 MHz,  $\text{CDCl}_3$ )  $\delta$  8.88 (d,  $J$  = 4.1 Hz, 1H), 8.10 (d,  $J$  = 8.6 Hz, 2H), 7.77 (d,  $J$  = 8.2 Hz, 1H), 7.68 (t,  $J$  = 7.7 Hz, 1H), 7.51 (t,  $J$  = 7.5 Hz, 1H), 7.36-7.33 (m, 1H).  $^{13}\text{C}$  NMR (101 MHz,  $\text{CDCl}_3$ )  $\delta$  150.39, 148.23, 136.15, 129.52, 129.40, 128.31, 127.83, 126.59, 121.11. HRMS (ESI)  $m/z$  calcd for  $\text{C}_9\text{H}_8\text{N}$   $[\text{M}+\text{H}]^+$  130.0651, found 130.0652.

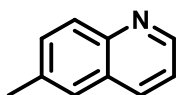

**6-methylquinoline(3b):** The title compound was obtained by column chromatography (PE:EA = 20:1) as yellow oil (57.3 mg) in 80 % yield according to the Method A.  $^1\text{H}$  NMR (400 MHz,  $\text{CDCl}_3$ )  $\delta$  8.82 (d,  $J$  = 4.1 Hz, 1H), 8.02-7.97 (m, 2H), 7.52 (d,  $J$  = 9.7 Hz, 2H), 7.34-7.30 (m, 1H), 2.51 (s, 3H).  $^{13}\text{C}$  NMR (101 MHz,  $\text{CDCl}_3$ )  $\delta$  149.57, 146.92, 136.45, 135.45, 131.82, 129.13, 128.37, 126.65, 121.13, 21.64. HRMS (ESI)  $m/z$  calcd for  $\text{C}_{10}\text{H}_{10}\text{N}$   $[\text{M}+\text{H}]^+$  144.0808, found 144.0807.

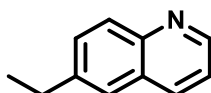

**6-ethylquinoline(3c):** The title compound was obtained by column chromatography (PE:EA = 20:1) as yellow oil (62.9 mg) in 80 % yield according to the Method A.  $^1\text{H}$  NMR (400 MHz,  $\text{CDCl}_3$ )  $\delta$  8.85 – 8.80 (m, 1H), 8.07 – 7.98 (m, 2H), 7.55 (d,  $J$  = 7.4 Hz, 2H), 7.33-7.30 (m, 1H), 2.83-2.77 (m, 2H), 1.31 (t,  $J$  = 7.6 Hz, 3H).  $^{13}\text{C}$  NMR (101 MHz,  $\text{CDCl}_3$ )  $\delta$  149.59, 147.12, 142.63, 135.60, 130.76, 129.26, 128.40, 125.31, 121.07, 28.89, 15.42. HRMS (ESI)  $m/z$  calcd for  $\text{C}_{11}\text{H}_{12}\text{N}$   $[\text{M}+\text{H}]^+$  158.0964, found 158.0963.

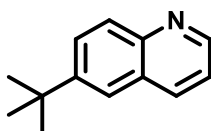

**6-(tert-butyl)quinoline(3d):** The title compound was obtained by column chromatography (PE:EA = 20:1) as yellow oil (75.0 mg) in 81 % yield according to the Method A.  $^1\text{H}$  NMR (400 MHz,  $\text{CDCl}_3$ )  $\delta$  8.84 (d,  $J$  = 4.2 Hz, 1H), 8.10 (d,  $J$  = 8.3 Hz, 1H), 8.05 (d,  $J$  = 8.9 Hz, 1H), 7.80 (d,  $J$  = 8.9 Hz, 1H), 7.71 (s, 1H), 7.36-7.33 (m, 1H), 1.41 (s, 9H).  $^{13}\text{C}$  NMR (101 MHz,  $\text{CDCl}_3$ )  $\delta$  149.80, 149.45, 146.88, 136.16, 128.98, 128.56, 128.08, 122.78, 121.08, 35.00, 31.27. HRMS (ESI)  $m/z$  calcd for  $\text{C}_{13}\text{H}_{16}\text{N}$   $[\text{M}+\text{H}]^+$  186.1277, found 186.1275.

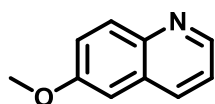

**6-methoxyquinoline(3e):** The title compound was obtained by column chromatography (PE:EA = 20:1) as yellow oil (62.9 mg) in 79 % yield according to the Method A.  $^1\text{H}$  NMR (400 MHz,  $\text{CDCl}_3$ )  $\delta$  8.76 – 8.69 (m, 1H), 8.00–7.96 (m, 2H), 7.37 – 7.27 (m, 2H), 7.01 (s, 1H), 3.88 (s, 3H).  $^{13}\text{C}$  NMR (101 MHz,  $\text{CDCl}_3$ )  $\delta$  157.74, 147.93, 144.41, 134.85, 130.83, 129.33, 122.34, 121.40, 105.12, 55.54. HRMS (ESI)  $m/z$  calcd for  $\text{C}_{10}\text{H}_{10}\text{NO}$   $[\text{M}+\text{H}]^+$  160.0757, found 160.0756.

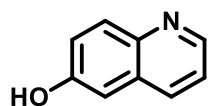

**quinolin-6-ol(3f):** The title compound was obtained by column chromatography (PE:EA = 10:1) as yellow oil (14.5 mg) in 20 % yield according to the Method A.  $^1\text{H}$  NMR (400 MHz, DMSO)  $\delta$  9.87 (s, 1H), 8.49 – 8.36 (m, 1H), 7.89 (d,  $J$  = 8.3 Hz, 1H), 7.66 (d,  $J$  = 9.1 Hz, 1H), 7.16 – 7.09 (m, 2H), 6.94 (s, 1H).  $^{13}\text{C}$  NMR (101 MHz, DMSO)  $\delta$  155.57, 147.16, 143.11, 134.20, 130.47, 129.40, 122.08, 121.44, 108.4. HRMS (ESI)  $m/z$  calcd for  $\text{C}_9\text{H}_8\text{NO}$   $[\text{M}+\text{H}]^+$  146.06, found 146.0589.

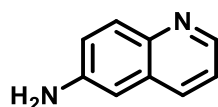

**quinolin-6-amine(3g):** The title compound was obtained by column chromatography (PE:EA = 10:1) as yellow solids (13.6 mg) in 19 % yield according to the Method A.  $^1\text{H}$  NMR (400 MHz,  $\text{CDCl}_3$ )  $\delta$  8.62 (d,  $J$  = 4.0 Hz, 1H), 7.90–7.82 (m, 2H), 7.24–7.21 (m, 1H), 7.12–7.09 (m, 1H), 6.84 (s, 1H), 3.94 (s, 2H).  $^{13}\text{C}$  NMR (101 MHz,  $\text{CDCl}_3$ )  $\delta$  146.77, 144.78, 143.39, 133.82, 130.48, 129.82, 121.64, 121.42, 107.39. HRMS (ESI)  $m/z$  calcd for  $\text{C}_9\text{H}_9\text{N}_2$   $[\text{M}+\text{H}]^+$  145.076, found 145.0758.

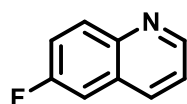

**6-fluoroquinoline(3h):** The title compound was obtained by column chromatography (PE:EA = 20:1) as yellow oil (43.4 mg) in 59 % yield according to the Method A.  $^1\text{H}$  NMR (400 MHz,  $\text{CDCl}_3$ )  $\delta$  8.84 (d,  $J$  = 4.1 Hz, 1H), 8.10 – 8.04 (m, 2H), 7.47–7.44 (m, 1H), 7.40 – 7.34 (m, 2H).  $^{13}\text{C}$  NMR (101 MHz,  $\text{Chloroform-}d$ )  $\delta$  73.32, 73.54, 82.37, 82.63, 84.50, 91.55, 91.65, 94.60, 94.69, 98.17, 98.22, 108.04, 112.36, 112.39, 121.86, 124.33. HRMS (ESI)  $m/z$  calcd for  $\text{C}_9\text{H}_7\text{FN}$   $[\text{M}+\text{H}]^+$  148.0557, found 148.0555.

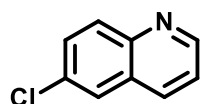

**6-chloroquinoline(3i):** The title compound was obtained by column chromatography (PE:EA =20:1) as yellow oil ( 49.9 mg) in 61 % yield according to the Method A.  $^1\text{H}$  NMR (400 MHz,  $\text{CDCl}_3$ )  $\delta$  8.86 (d,  $J$  = 3.9 Hz, 1H), 8.00 (d,  $J$  = 8.7 Hz, 2H), 7.73 (d,  $J$  = 1.4 Hz, 1H), 7.61-7.58 (m, 1H), 7.38-7.34 (m, 1H).  $^{13}\text{C}$  NMR (101 MHz,  $\text{CDCl}_3$ )  $\delta$  150.64, 146.65, 135.16, 132.31, 131.14, 130.44, 128.85, 126.46, 121.95. HRMS (ESI)  $m/z$  calcd for  $\text{C}_9\text{H}_7^{35.5}\text{ClN}$   $[\text{M}+\text{H}]^+$  164.0262, found 164.0262.

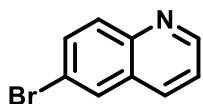

**6-bromoquinoline(3j):** The title compound was obtained by column chromatography (PE:EA = 20:1) as yellow oil ( 57.2 mg) in 55 % yield according to the Method A.  $^1\text{H}$  NMR (400 MHz,  $\text{CDCl}_3$ )  $\delta$  8.90 – 8.84 (m, 1H), 7.99 (d,  $J$  = 8.3 Hz, 1H), 7.95 – 7.89 (m, 2H), 7.72 (d,  $J$  = 9.0 Hz, 1H), 7.37-7.34 (m, 1H).  $^{13}\text{C}$  NMR (101 MHz,  $\text{CDCl}_3$ )  $\delta$  150.75, 146.81, 135.07, 132.96, 131.22, 129.82, 129.34, 121.91, 120.48. HRMS (ESI)  $m/z$  calcd for  $\text{C}_9\text{H}_7^{79}\text{BrN}$   $[\text{M}+\text{H}]^+$  207.9756, found 207.9755.

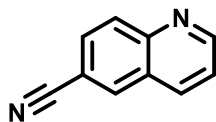

**quinoline-6-carbonitrile(3k):** The title compound was obtained by column chromatography (PE:EA = 20:1) as yellow oil ( 50.9 mg) in 66 % yield according to the Method A.  $^1\text{H}$  NMR (400 MHz,  $\text{CDCl}_3$ )  $\delta$  9.08 (s, 1H), 8.22-8.15 (m, 3H), 7.82 (d,  $J$  = 8.3 Hz, 1H), 7.53 (d,  $J$  = 4.7 Hz, 1H).  $^{13}\text{C}$  NMR (101 MHz,  $\text{CDCl}_3$ )  $\delta$  153.18, 149.22, 136.41, 134.22, 131.14, 130.15, 127.74, 122.93, 118.54, 110.41. HRMS (ESI)  $m/z$  calcd for  $\text{C}_{10}\text{H}_7\text{N}_2$   $[\text{M}+\text{H}]^+$  155.0604, found 155.0605.

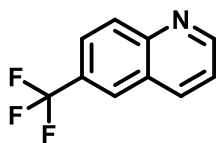

**6-(trifluoromethyl)quinoline(3l):** The title compound was obtained by column chromatography (PE:EA = 20:1) as yellow oil ( 57.2 mg) in 58 % yield according to the Method A.  $^1\text{H}$  NMR (400 MHz,  $\text{CDCl}_3$ )  $\delta$  9.07 – 9.00 (m, 1H), 8.28 – 8.19 (m, 2H), 8.14 (s, 1H), 7.89 (d,  $J$  = 8.8 Hz, 1H), 7.53-7.49 (m, 1H).  $^{13}\text{C}$  NMR (101 MHz,  $\text{CDCl}_3$ )  $\delta$  152.62 (s), 149.28 (s), 137.02 (s), 130.85 (s), 128.62 (q,  $J$  = 32.3 Hz), 127.34 (s), 125.94 (q,  $J$  = 4.3 Hz), 125.30 (q,  $J$  = 2.9 Hz), 124.09 (q,  $J$  = 270.5 Hz), 122.41 (s). HRMS (ESI)  $m/z$  calcd for  $\text{C}_{10}\text{H}_7\text{F}_3\text{N}$   $[\text{M}+\text{H}]^+$  198.0531, found 198.0533.

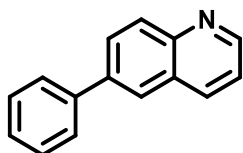

**6-phenylquinoline(3m):** The title compound was obtained by column chromatography (PE:EA = 20:1) as yellow oil ( 72.9 mg) in 71 % yield according to the Method A. <sup>1</sup>H NMR (400 MHz, CDCl<sub>3</sub>) δ 8.22-8.17 (m, 4H), 7.87 (d, *J* = 8.6 Hz, 1H), 7.83 (d, *J* = 8.1 Hz, 1H), 7.74 (t, *J* = 7.6 Hz, 1H), 7.59 – 7.44 (m, 4H). <sup>13</sup>C NMR (101 MHz, CDCl<sub>3</sub>) δ 157.46, 148.37, 139.77, 136.89, 129.82, 129.77, 129.43, 128.95, 127.68, 127.57, 127.28, 126.38, 119.11. HRMS (ESI) *m/z* calcd for C<sub>15</sub>H<sub>12</sub>N [M+H]<sup>+</sup> 206.0964, found 206.0971.

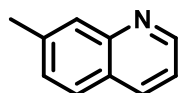

**7-methylquinoline(3n):** The title compound was obtained by column chromatography (PE:EA = 20:1) as yellow oil ( 47.3 mg) in 66 % yield according to the Method A. <sup>1</sup>H NMR (400 MHz, CDCl<sub>3</sub>) δ 8.85 (d, *J* = 4.0 Hz, 1H), 8.07 (d, *J* = 8.2 Hz, 1H), 7.87 (s, 1H), 7.67 (d, *J* = 8.3 Hz, 1H), 7.35 (d, *J* = 8.3 Hz, 1H), 7.31-7.27 (m, 1H), 2.54 (s, 3H). <sup>13</sup>C NMR (101 MHz, CDCl<sub>3</sub>) δ 150.41, 148.54, 139.80, 135.78, 128.86, 128.45, 127.48, 126.39, 120.34, 21.96. HRMS (ESI) *m/z* calcd for C<sub>10</sub>H<sub>10</sub>N [M+H]<sup>+</sup> 144.0808, found 144.0808.

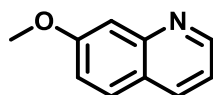

**7-methoxyquinoline(3o):** The title compound was obtained by column chromatography (PE:EA = 20:1) as yellow oil ( 48.6 mg) in 61 % yield according to the Method A. <sup>1</sup>H NMR (400 MHz, CDCl<sub>3</sub>) δ 8.79 (s, 1H), 8.01 (d, *J* = 7.7 Hz, 1H), 7.63 (d, *J* = 8.8 Hz, 1H), 7.39 (s, 1H), 7.23 – 7.13 (m, 2H), 3.90 (s, 3H). <sup>13</sup>C NMR (101 MHz, CDCl<sub>3</sub>) δ 160.67, 150.56, 149.96, 135.70, 128.82, 123.54, 119.82, 119.00, 107.29, 55.50. HRMS (ESI) *m/z* calcd for C<sub>10</sub>H<sub>10</sub>NO [M+H]<sup>+</sup> 160.0757, found 160.0756.

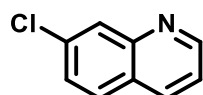

**7-chloroquinoline(3p):** The title compound was obtained by column chromatography (PE:EA = 20:1) as yellow oil ( 49.1 mg) in 60 % yield according to the Method A. <sup>1</sup>H NMR (400 MHz, CDCl<sub>3</sub>) δ 8.89 (d, *J* = 4.1 Hz, 1H), 8.10 (d, *J* = 12.3 Hz, 2H), 7.72 (d, *J* = 8.7 Hz, 1H), 7.47 (d, *J* = 8.7 Hz, 1H), 7.39-7.36 (m, 1H). <sup>13</sup>C NMR (101 MHz, CDCl<sub>3</sub>) δ 151.39, 148.56, 136.03, 135.40, 129.13, 128.47, 127.76, 126.69, 121.35. HRMS (ESI) *m/z* calcd for C<sub>9</sub>H<sub>7</sub><sup>35,37</sup>ClN [M+H]<sup>+</sup> 164.0262, found 164.0263.

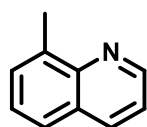

**8-methylquinoline(3q):** The title compound was obtained by column chromatography (PE:EA = 20:1) as yellow oil ( 53.0 mg) in 74 % yield according to the Method A. <sup>1</sup>H NMR (400 MHz, CDCl<sub>3</sub>) δ 8.97 – 8.92 (m, 1H), 8.11 (d, *J* = 8.2 Hz, 1H), 7.65 (d, *J* = 8.1 Hz, 1H), 7.56 (d, *J* = 6.9 Hz, 1H), 7.46 – 7.34 (m, 2H),

2.83 (s, 3H).  $^{13}\text{C}$  NMR (101 MHz,  $\text{CDCl}_3$ )  $\delta$  149.34, 147.44, 137.15, 136.42, 129.72, 128.35, 126.39, 125.97, 120.93, 18.28. HRMS (ESI)  $m/z$  calcd for  $\text{C}_{10}\text{H}_{10}\text{N}$   $[\text{M}+\text{H}]^+$  144.0808, found 144.0809.

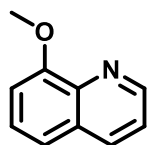

**8-methoxyquinoline(3r):** The title compound was obtained by column chromatography (PE:EA = 20:1) as yellow oil ( 39.1 mg) in 49 % yield according to the Method A.  $^1\text{H}$  NMR (400 MHz,  $\text{CDCl}_3$ )  $\delta$  8.86 (d,  $J$  = 4.1 Hz, 1H), 8.04 (d,  $J$  = 8.3 Hz, 1H), 7.41-7.29 (m, 3H), 6.98 (d,  $J$  = 7.6 Hz, 1H), 4.02 (s, 3H).  $^{13}\text{C}$  NMR (101 MHz,  $\text{CDCl}_3$ )  $\delta$  155.30, 149.17, 140.11, 135.85, 129.28, 126.67, 121.64, 119.50, 107.49, 55.91. HRMS (ESI)  $m/z$  calcd for  $\text{C}_{10}\text{H}_{10}\text{NO}$   $[\text{M}+\text{H}]^+$  160.0757, found 160.0754.

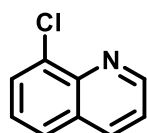

**8-chloroquinoline(3s):** The title compound was obtained by column chromatography (PE:EA = 20:1) as yellow oil ( 43.2 mg) in 53 % yield according to the Method A.  $^1\text{H}$  NMR (400 MHz,  $\text{CDCl}_3$ )  $\delta$  9.04 – 8.97 (m, 1H), 8.14 (d,  $J$  = 8.3 Hz, 1H), 7.80 (d,  $J$  = 7.5 Hz, 1H), 7.70 (d,  $J$  = 8.2 Hz, 1H), 7.46 – 7.39 (m, 2H).  $^{13}\text{C}$  NMR (101 MHz,  $\text{CDCl}_3$ )  $\delta$  151.05, 144.46, 136.61, 133.46, 129.67, 129.62, 127.06, 126.57, 121.99. HRMS (ESI)  $m/z$  calcd for  $\text{C}_9\text{H}_7^{35,37}\text{ClN}$   $[\text{M}+\text{H}]^+$  164.0262, found 164.0261.

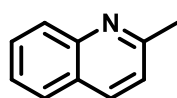

**2-methylquinoline(3t):** The title compound was obtained by column chromatography (PE:EA = 20:1) as yellow oil ( 50.1 mg) in 70 % yield according to the Method A.  $^1\text{H}$  NMR (400 MHz,  $\text{CDCl}_3$ )  $\delta$  8.04 (dd,  $J$  = 8.3, 4.8 Hz, 2H), 7.77 (d,  $J$  = 8.1 Hz, 1H), 7.69 (t,  $J$  = 7.7 Hz, 1H), 7.49 (t,  $J$  = 7.5 Hz, 1H), 7.28 (d,  $J$  = 8.4 Hz, 1H), 2.76 (s, 3H).  $^{13}\text{C}$  NMR (101 MHz,  $\text{CDCl}_3$ )  $\delta$  159.04, 147.91, 136.22, 129.48, 128.68, 127.55, 126.53, 125.72, 122.05, 25.46. HRMS (ESI)  $m/z$  calcd for  $\text{C}_{10}\text{H}_{10}\text{N}$   $[\text{M}+\text{H}]^+$  144.0808, found 144.0810.

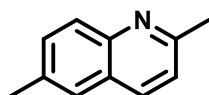

**2-ethylquinoline(3u):** The title compound was obtained by column chromatography (PE:EA = 20:1) as yellow oil ( 54.2 mg) in 69 % yield according to the Method A.  $^1\text{H}$  NMR (400 MHz,  $\text{CDCl}_3$ )  $\delta$  7.85 (d,  $J$  = 8.5 Hz, 1H), 7.77 (d,  $J$  = 8.4 Hz, 1H), 7.43 – 7.32 (m, 2H), 7.08 (d,  $J$  = 8.4 Hz, 1H), 2.62 (s, 3H), 2.38 (s, 3H).  $^{13}\text{C}$  NMR (101 MHz,  $\text{CDCl}_3$ )  $\delta$  157.73, 146.27, 135.32, 135.12, 131.43, 128.14, 126.30, 126.23, 121.74, 25.09, 21.27. HRMS (ESI)  $m/z$  calcd for  $\text{C}_{11}\text{H}_{12}\text{N}$   $[\text{M}+\text{H}]^+$  158.0964, found 158.0964.



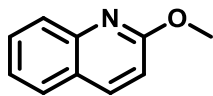

**2-methoxyquinoline(3v):** The title compound was obtained by column chromatography (PE:EA = 20:1) as yellow oil ( 53.3 mg) in 67 % yield according to the Method A.  $^1\text{H}$  NMR (400 MHz,  $\text{CDCl}_3$ )  $\delta$  7.96 (d,  $J$  = 8.8 Hz, 1H), 7.88 (d,  $J$  = 8.4 Hz, 1H), 7.71 (d,  $J$  = 8.0 Hz, 1H), 7.63 (t,  $J$  = 7.7 Hz, 1H), 7.38 (t,  $J$  = 7.5 Hz, 1H), 6.91 (d,  $J$  = 8.8 Hz, 1H), 4.10 (s, 3H).  $^{13}\text{C}$  NMR (101 MHz,  $\text{CDCl}_3$ )  $\delta$  162.51, 146.69, 138.76, 129.58, 127.54, 127.33, 125.18, 124.08, 113.17, 53.48. HRMS (ESI)  $m/z$  calcd for  $\text{C}_{10}\text{H}_{10}\text{NO}$   $[\text{M}+\text{H}]^+$  160.0757, found 160.0726.

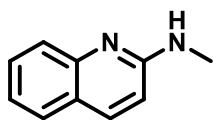

**N-methylquinolin-2-amine(3w):** The title compound was obtained by column chromatography (PE:EA = 20:1) as yellow oil ( 44.3 mg) in 56 % yield according to the Method A.  $^1\text{H}$  NMR (400 MHz,  $\text{CDCl}_3$ )  $\delta$  7.80 (d,  $J$  = 8.9 Hz, 1H), 7.71 (d,  $J$  = 8.4 Hz, 1H), 7.59 – 7.50 (m, 2H), 7.20 (t,  $J$  = 7.4 Hz, 1H), 6.62 (d,  $J$  = 8.9 Hz, 1H), 4.89 (s, 1H), 3.07 (d,  $J$  = 3.6 Hz, 3H).  $^{13}\text{C}$  NMR (101 MHz,  $\text{CDCl}_3$ )  $\delta$  157.77, 148.15, 137.34, 129.64, 127.56, 126.11, 123.42, 122.05, 111.31, 28.78. HRMS (ESI)  $m/z$  calcd for  $\text{C}_{10}\text{H}_{11}\text{N}_2$   $[\text{M}+\text{H}]^+$  159.0917, found 159.0919.

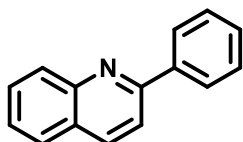

**2-phenylquinoline(3x):** The title compound was obtained by column chromatography (PE:EA = 20:1) as yellow oil ( 48.2 mg) in 47 % yield according to the Method A.  $^1\text{H}$  NMR (400 MHz,  $\text{CDCl}_3$ )  $\delta$  8.26 – 8.15 (m, 4H), 7.87-7.80 (m, 2H), 7.75 (t,  $J$  = 7.7 Hz, 1H), 7.59 – 7.45 (m, 4H).  $^{13}\text{C}$  NMR (101 MHz,  $\text{CDCl}_3$ )  $\delta$  157.38, 148.31, 139.71, 136.83, 129.76, 129.72, 129.39, 128.90, 127.64, 127.53, 127.22, 126.33, 119.05. HRMS (ESI)  $m/z$  calcd for  $\text{C}_{15}\text{H}_{12}\text{N}$   $[\text{M}+\text{H}]^+$  206.0964, found 206.0976.

## 4. Copies of $^1\text{H}$ and $^{13}\text{C}$ NMR

### quinoline(5a):

$^1\text{H}$  NMR, 400 MHz,  $\text{CDCl}_3$

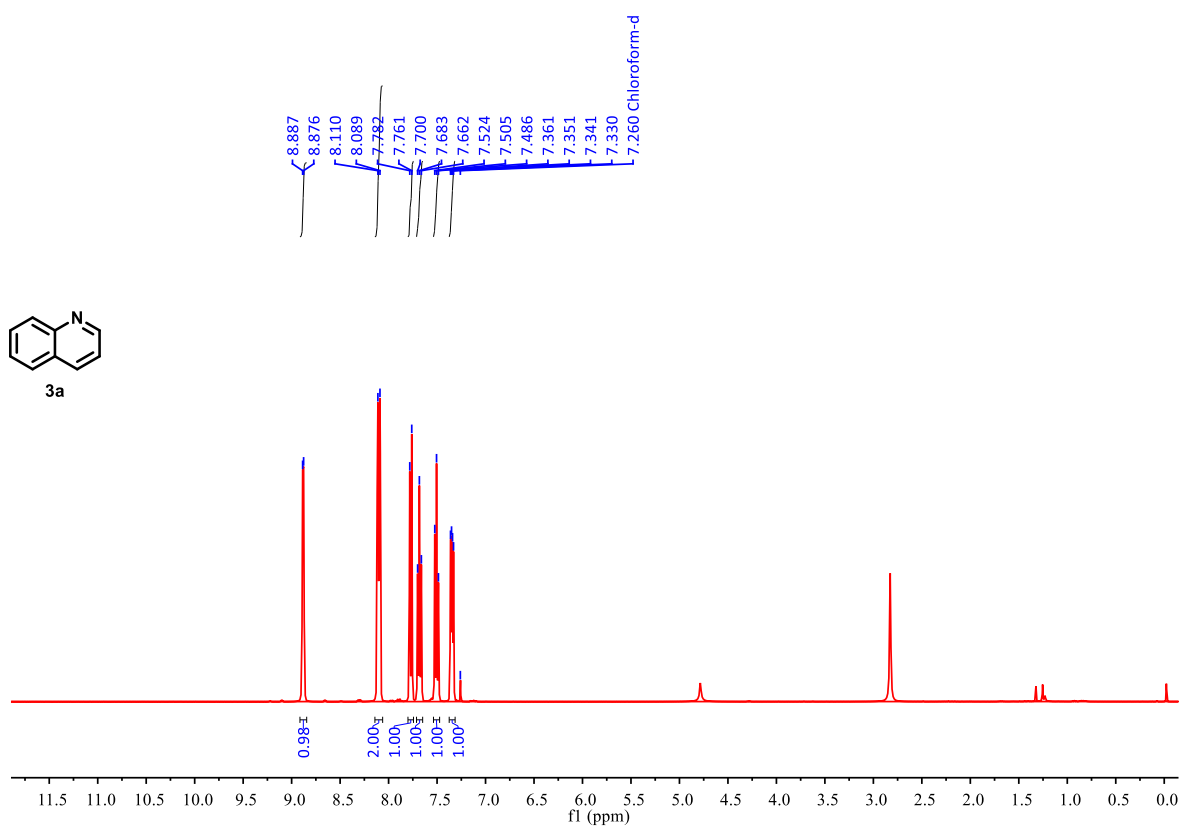

<sup>13</sup>C NMR, 101 MHz, CDCl<sub>3</sub>

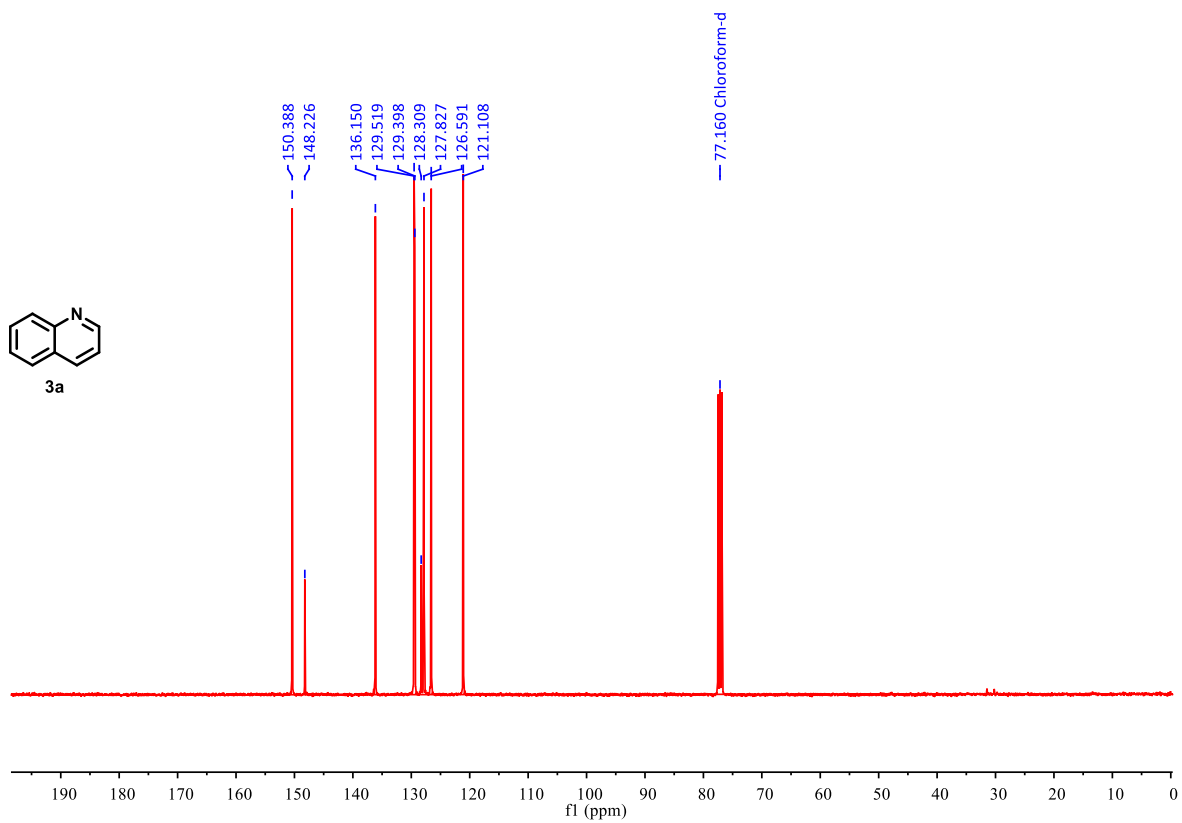

**6-methylquinoline(3b):**

<sup>1</sup>H NMR, 400 MHz, CDCl<sub>3</sub>

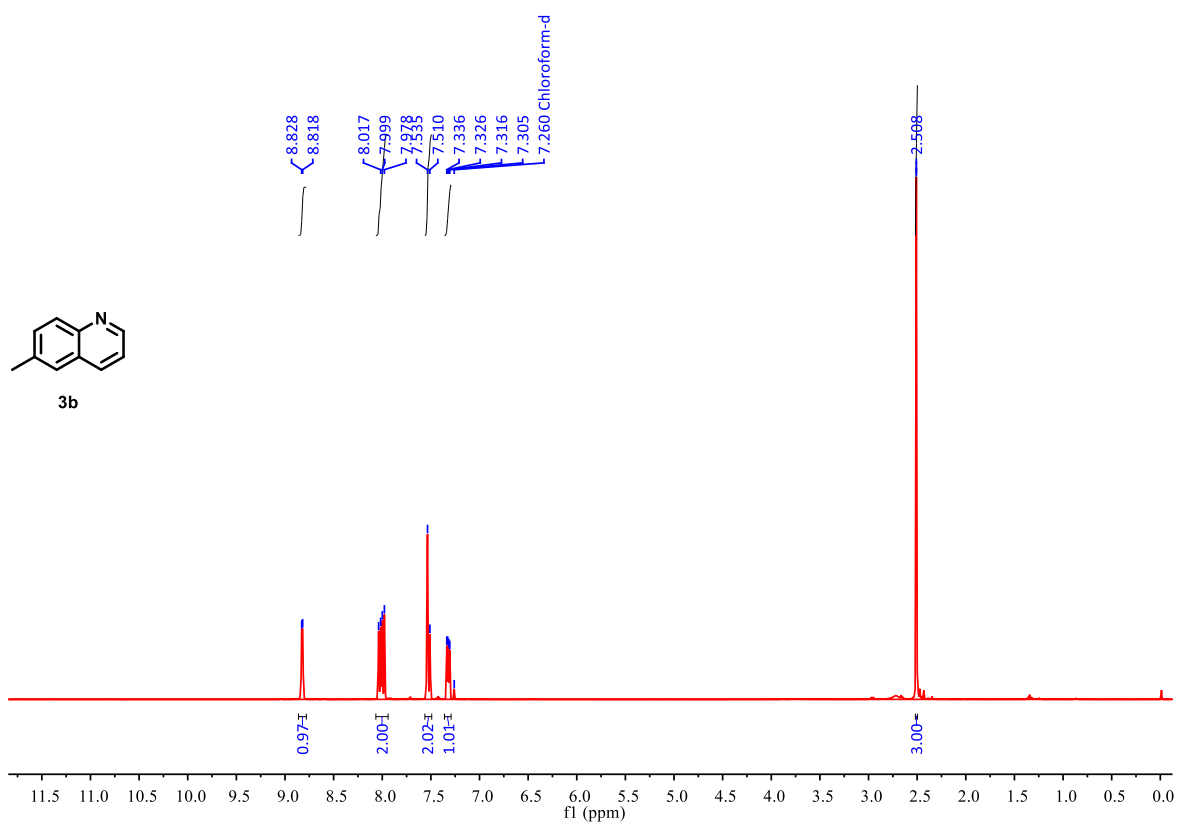

<sup>13</sup>C NMR, 101 MHz, CDCl<sub>3</sub>

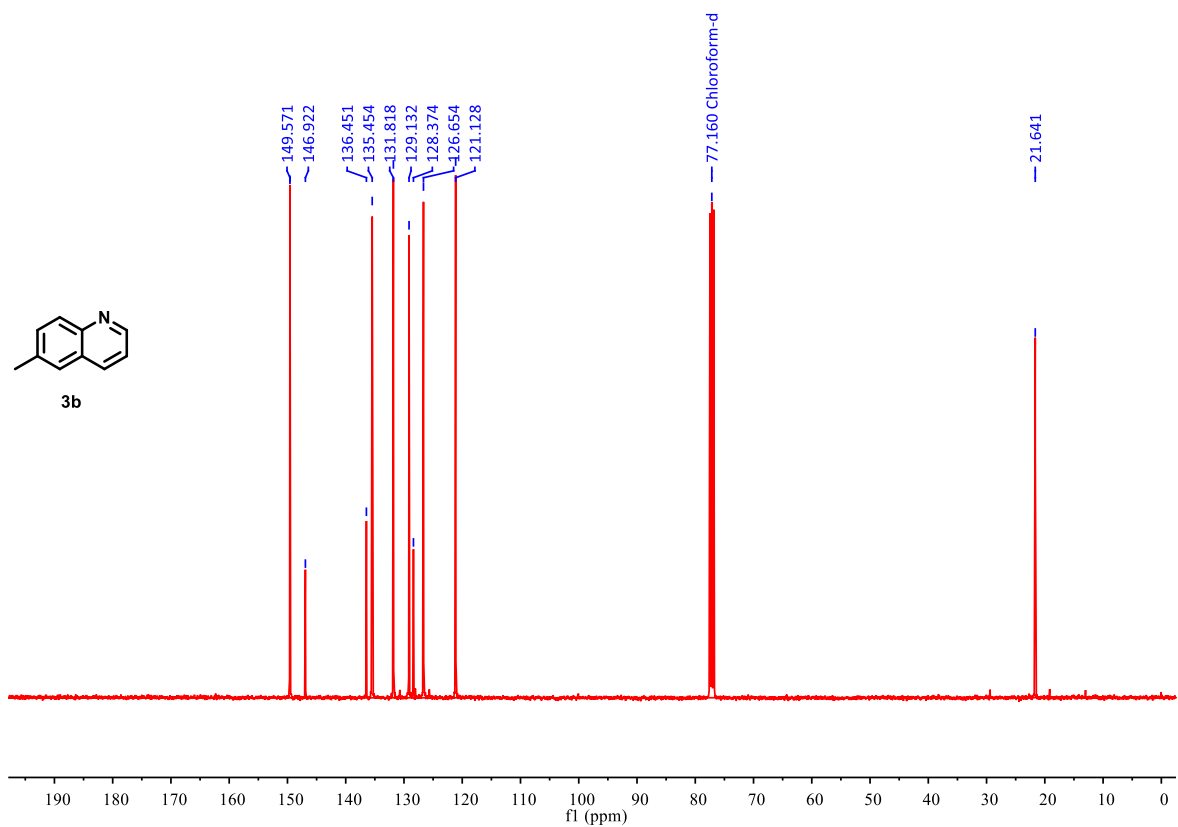

**6-ethylquinoline(3c):**

<sup>1</sup>H NMR, 400 MHz, CDCl<sub>3</sub>

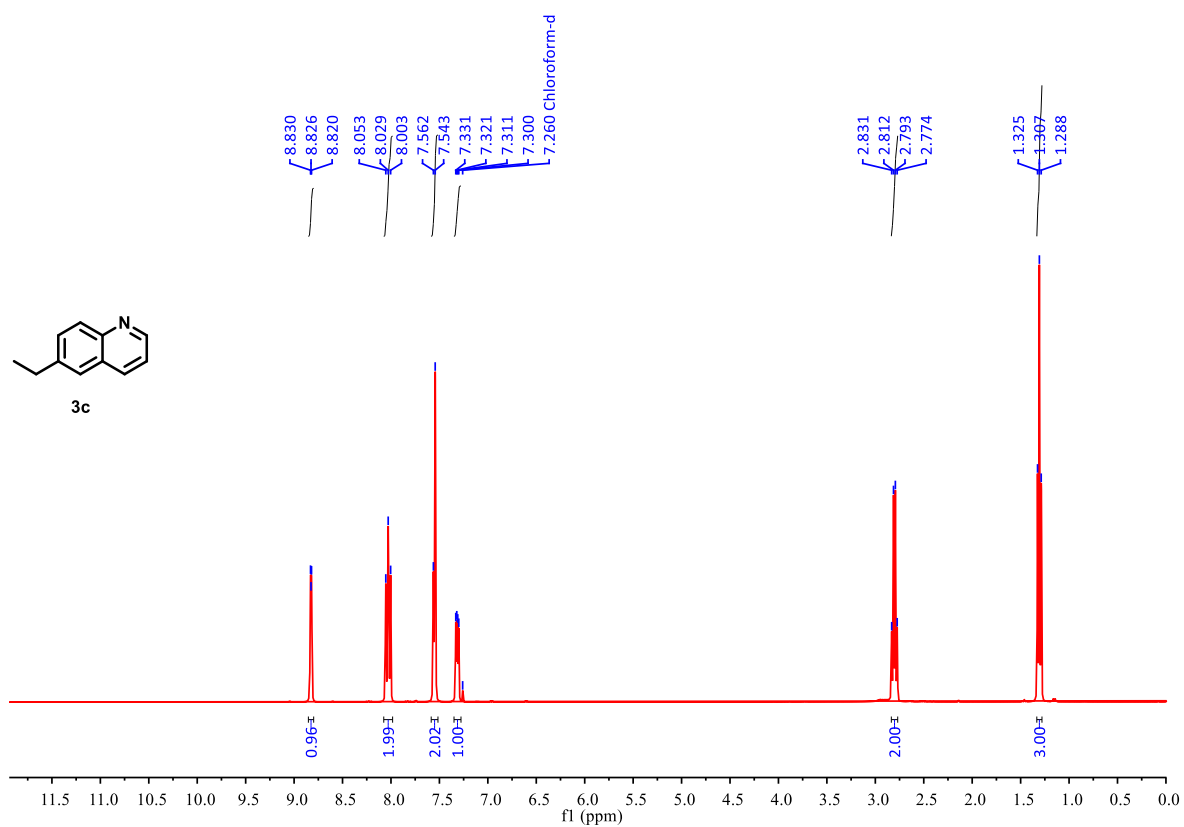

<sup>13</sup>C NMR, 101 MHz, CDCl<sub>3</sub>

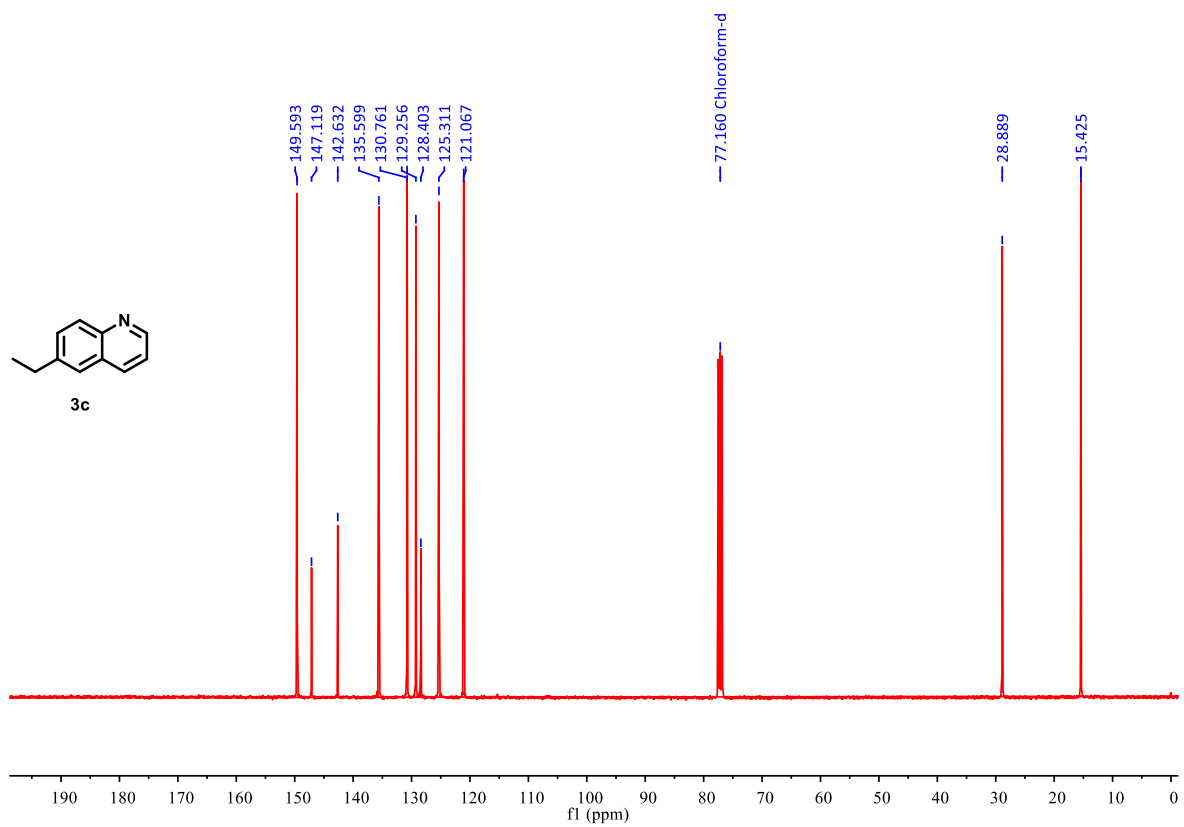

**6-(tert-butyl)quinoline(3d):**

<sup>1</sup>H NMR, 400 MHz, CDCl<sub>3</sub>

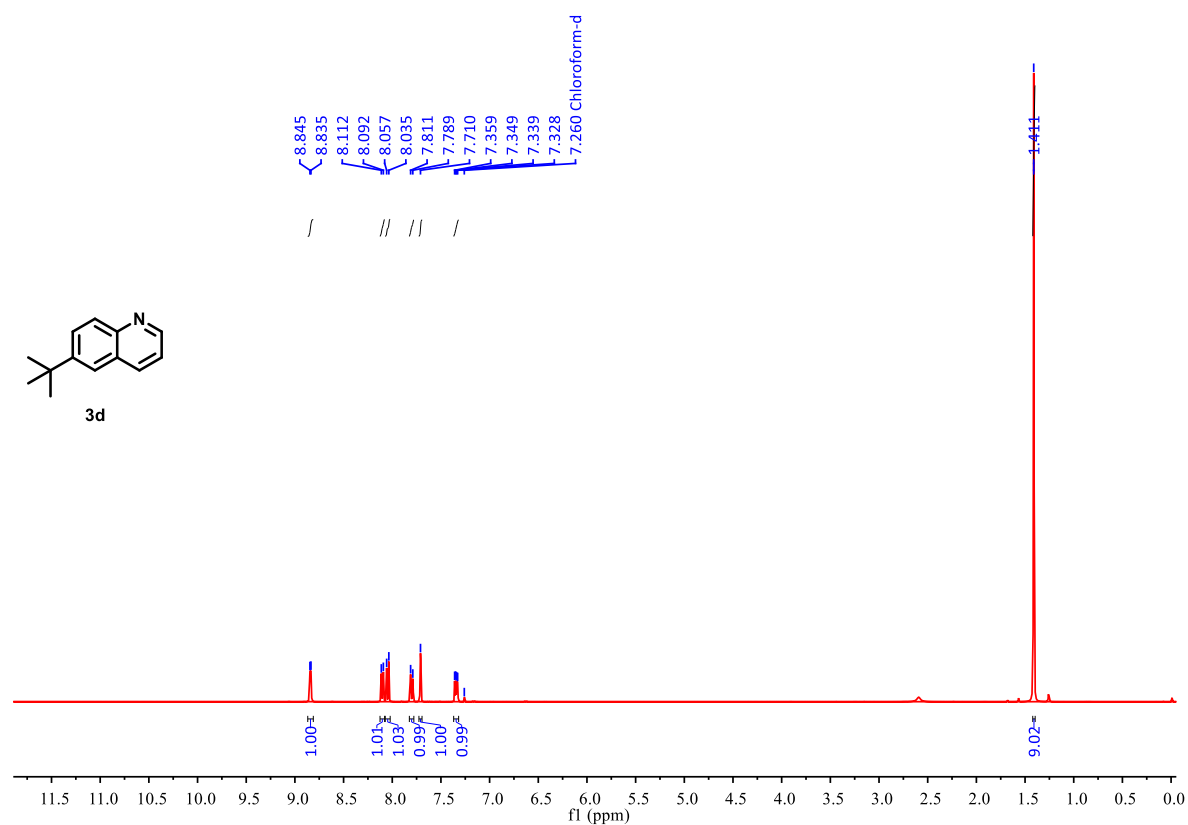

<sup>13</sup>C NMR, 101 MHz, CDCl<sub>3</sub>

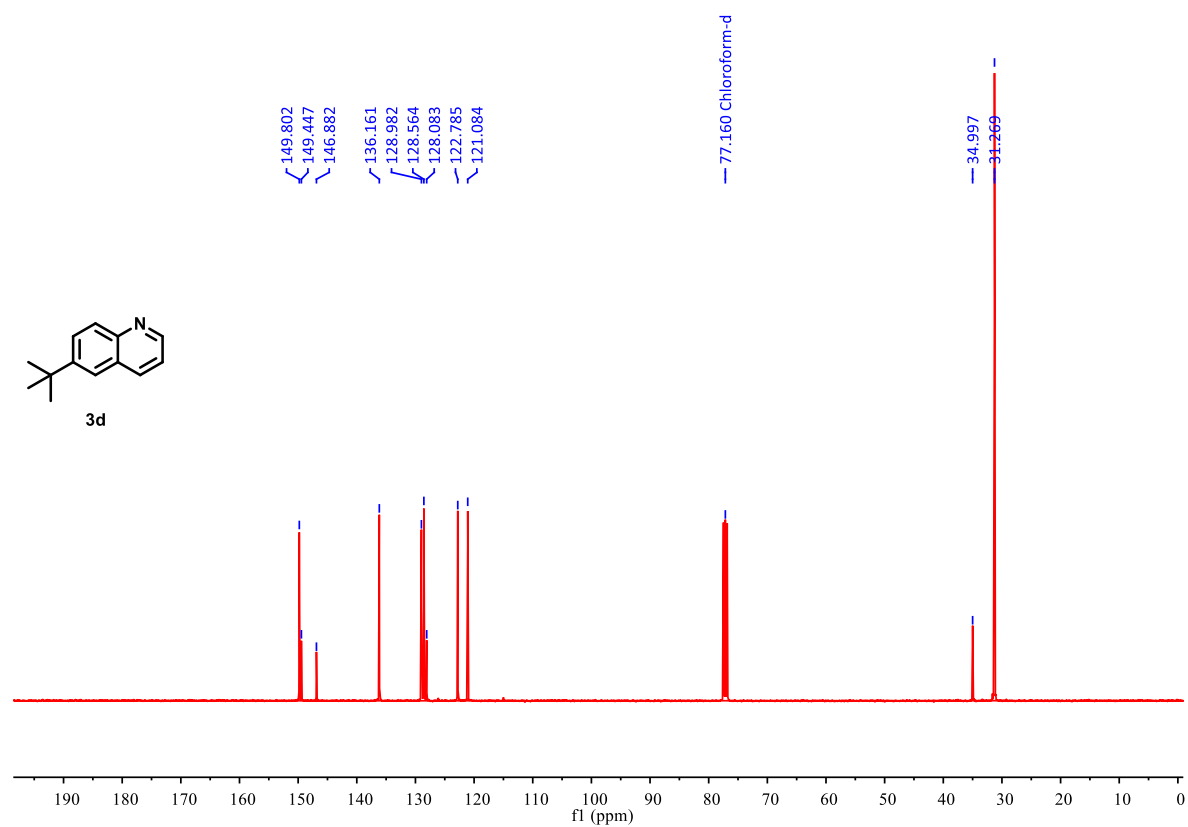

**6-methoxyquinoline(3e):**

<sup>1</sup>H NMR, 400 MHz, CDCl<sub>3</sub>

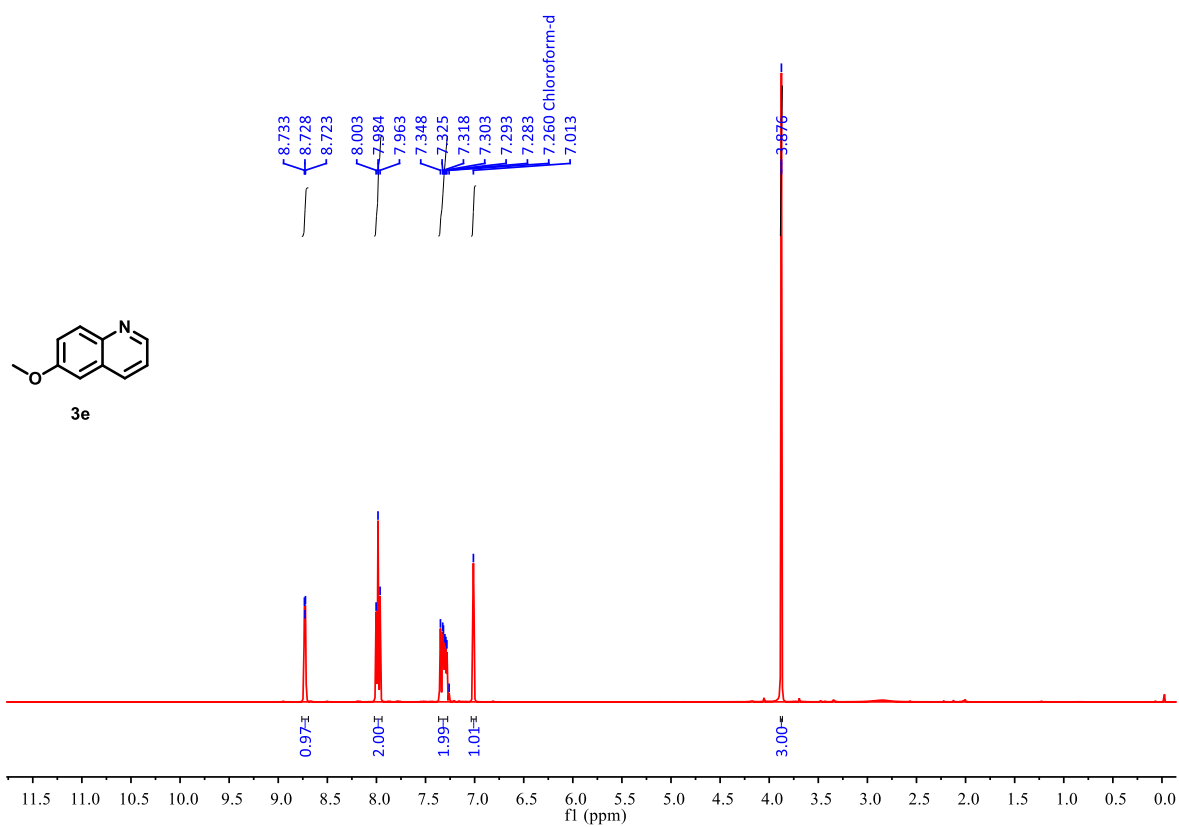

<sup>13</sup>C NMR, 101 MHz, CDCl<sub>3</sub>

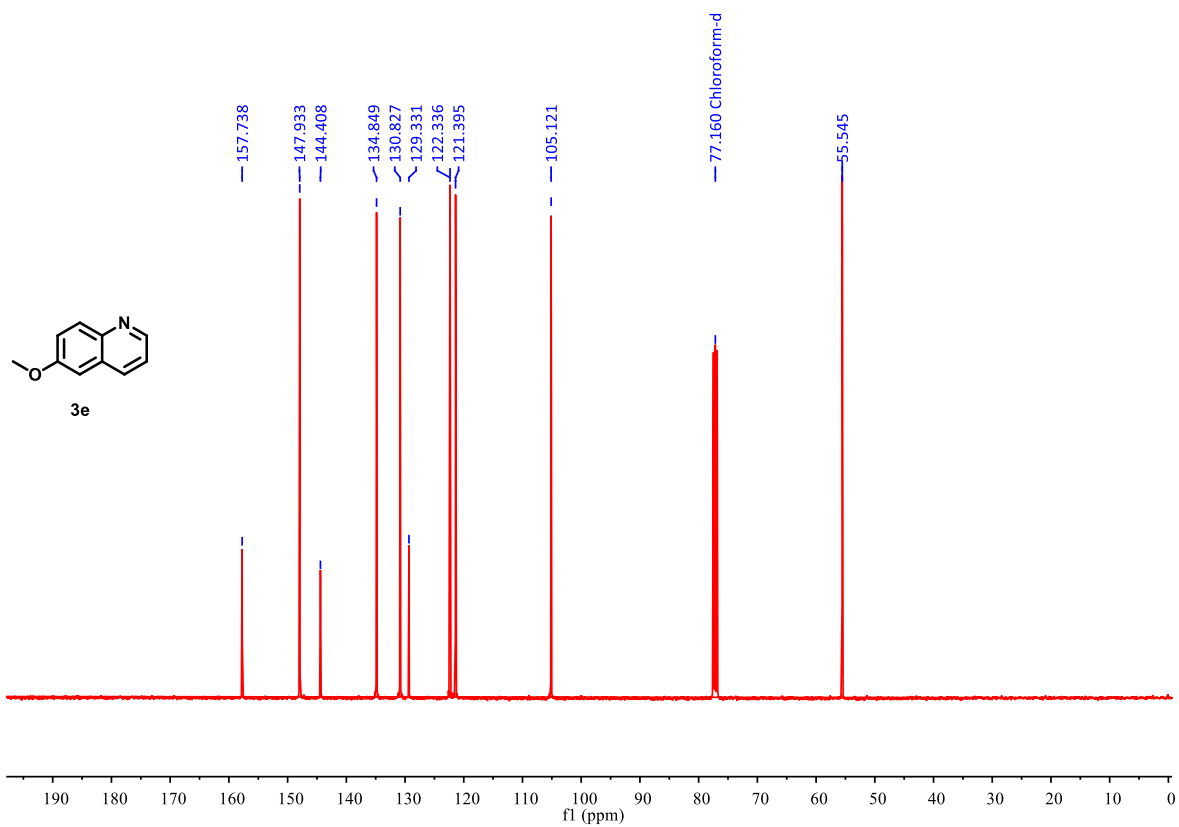

**quinolin-6-ol(3f):**

<sup>1</sup>H NMR, 400 MHz, CDCl<sub>3</sub>

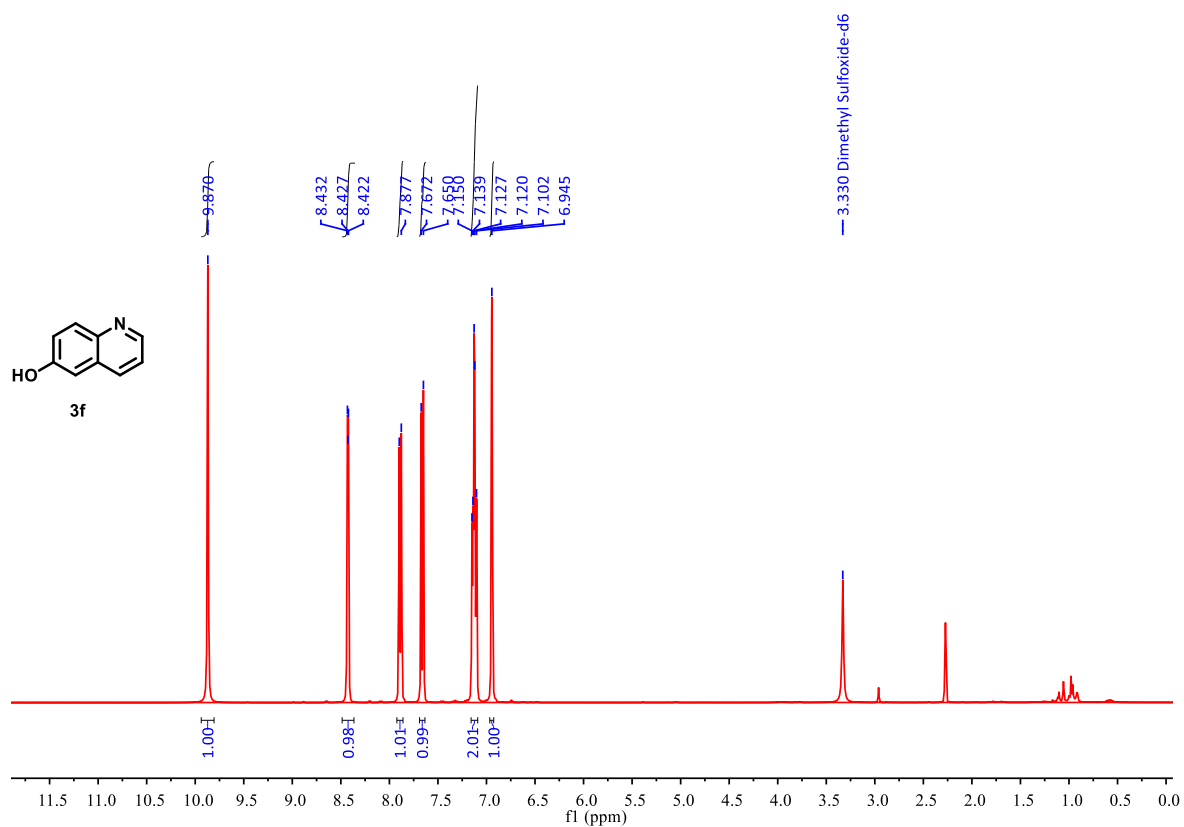

**<sup>13</sup>C NMR, 101 MHz, CDCl<sub>3</sub>**

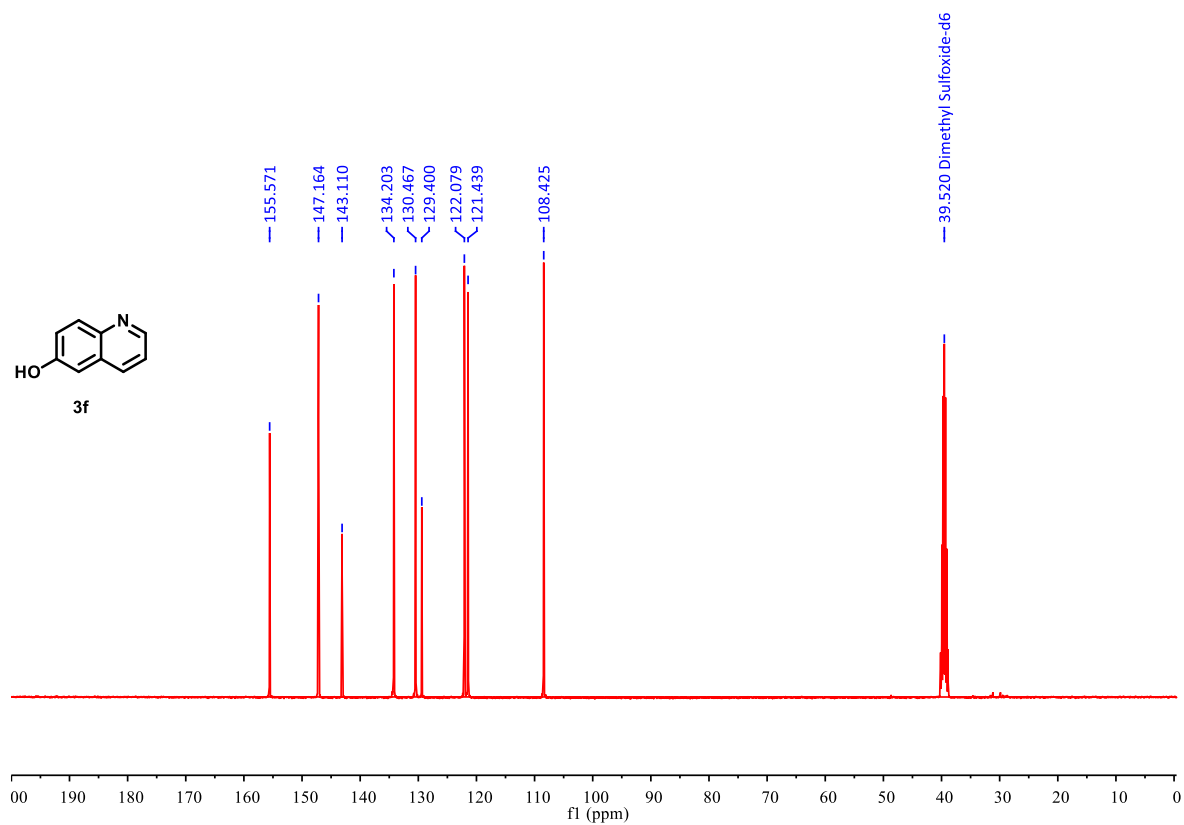

**quinolin-6-amine(3g):**

**<sup>1</sup>H NMR, 400 MHz, CDCl<sub>3</sub>**

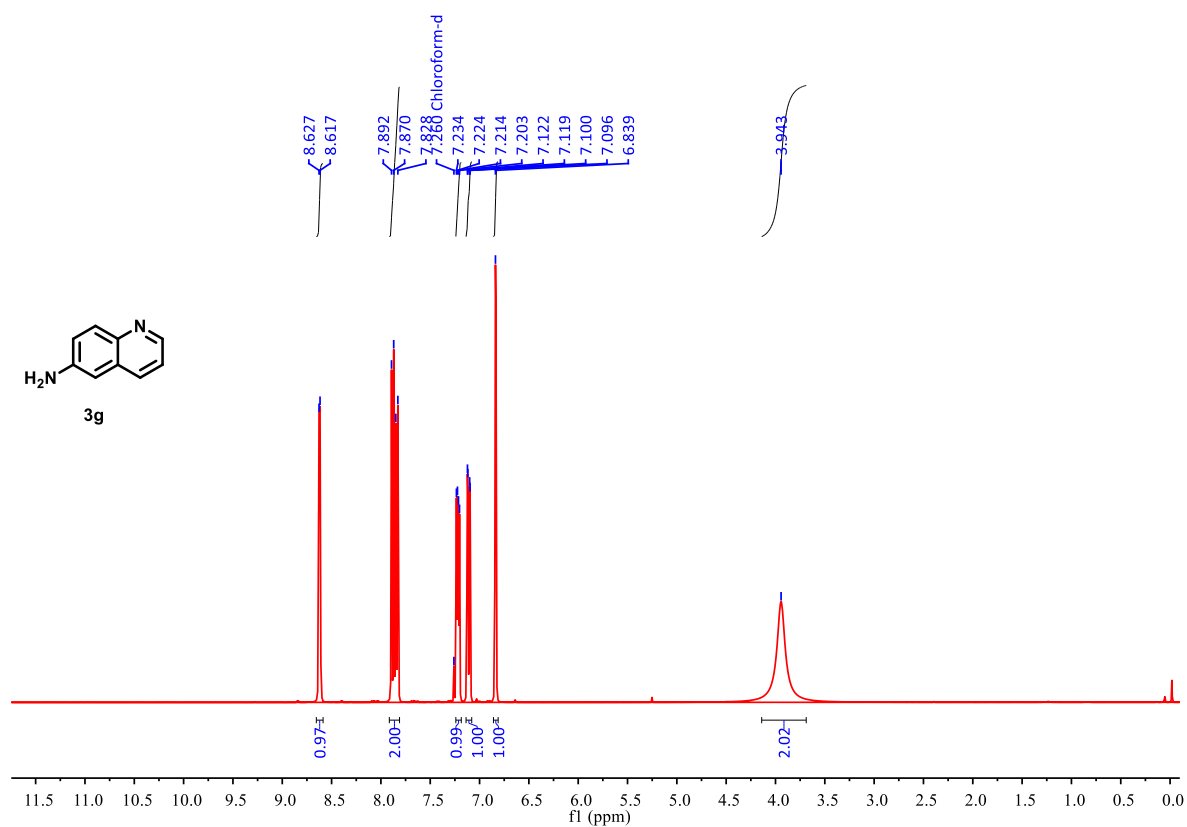

<sup>13</sup>C NMR, 101 MHz, CDCl<sub>3</sub>

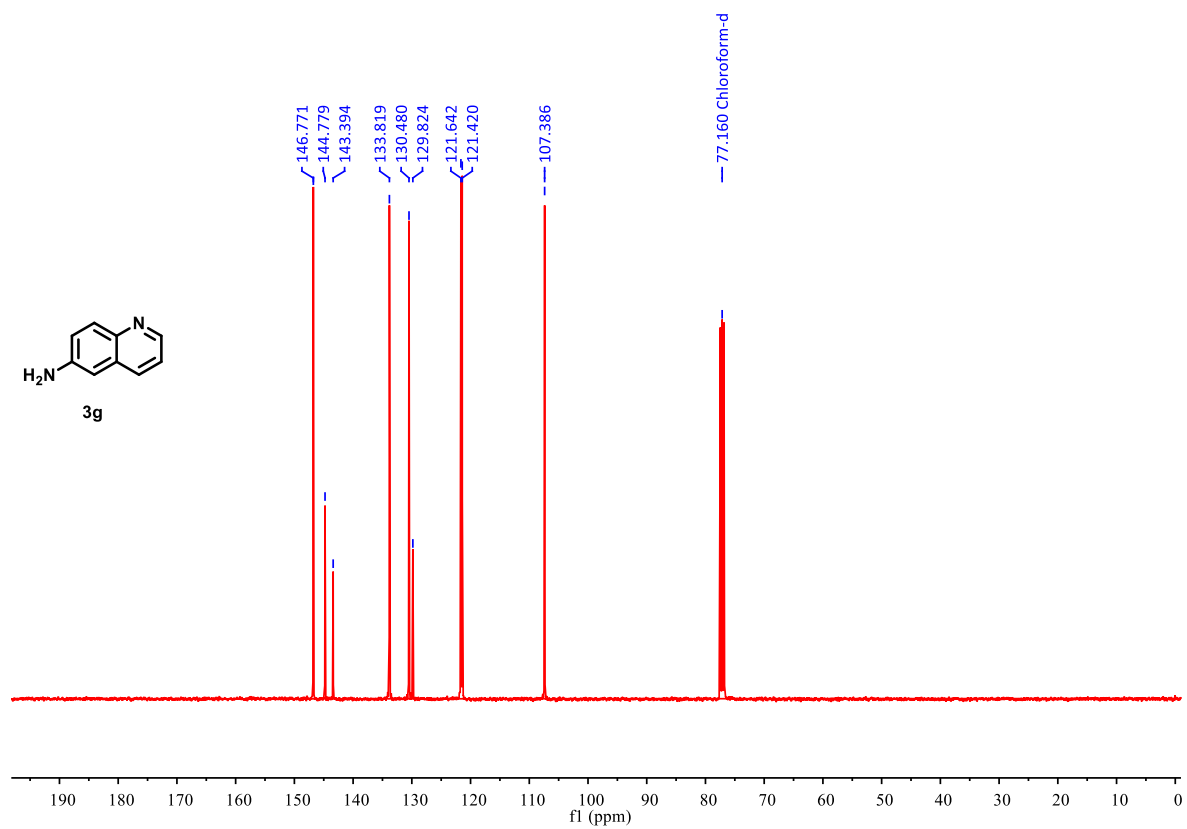

**6-fluoroquinoline(3h):**

<sup>1</sup>H NMR, 400 MHz, CDCl<sub>3</sub>



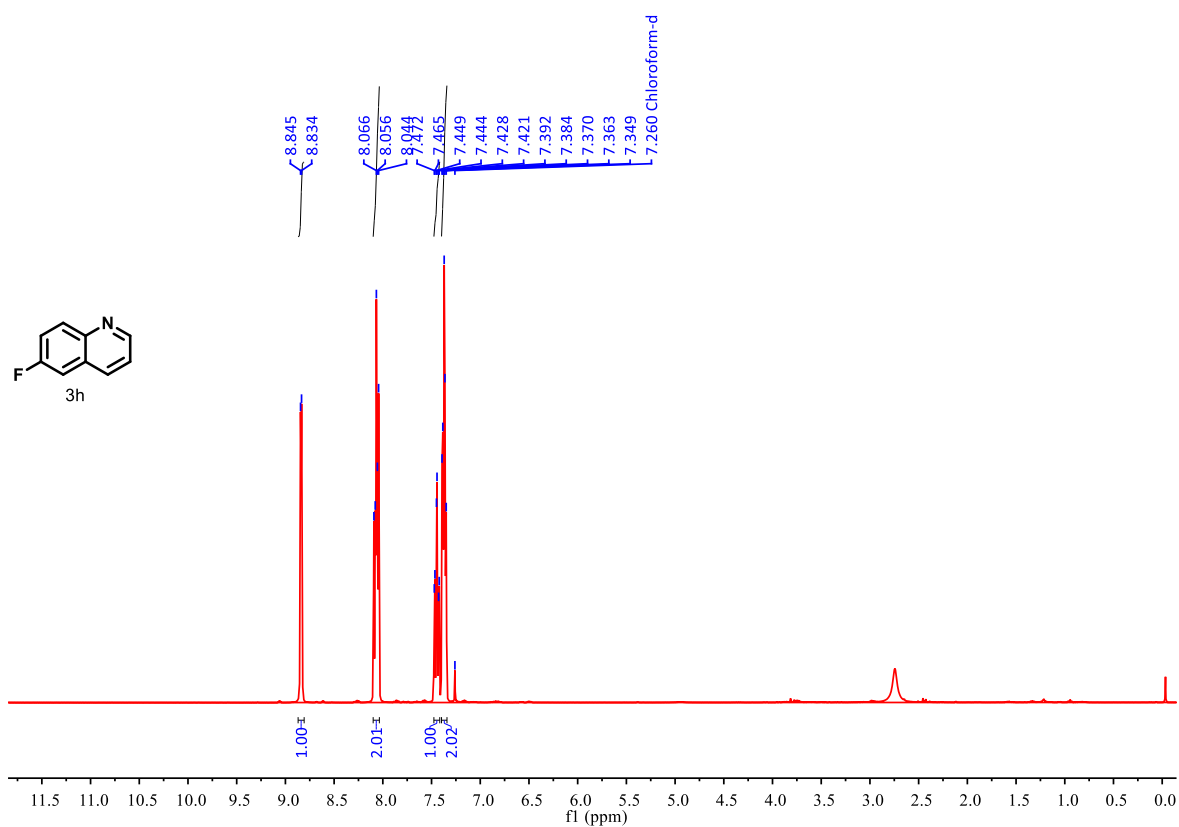

<sup>13</sup>C NMR, 101 MHz, CDCl<sub>3</sub>

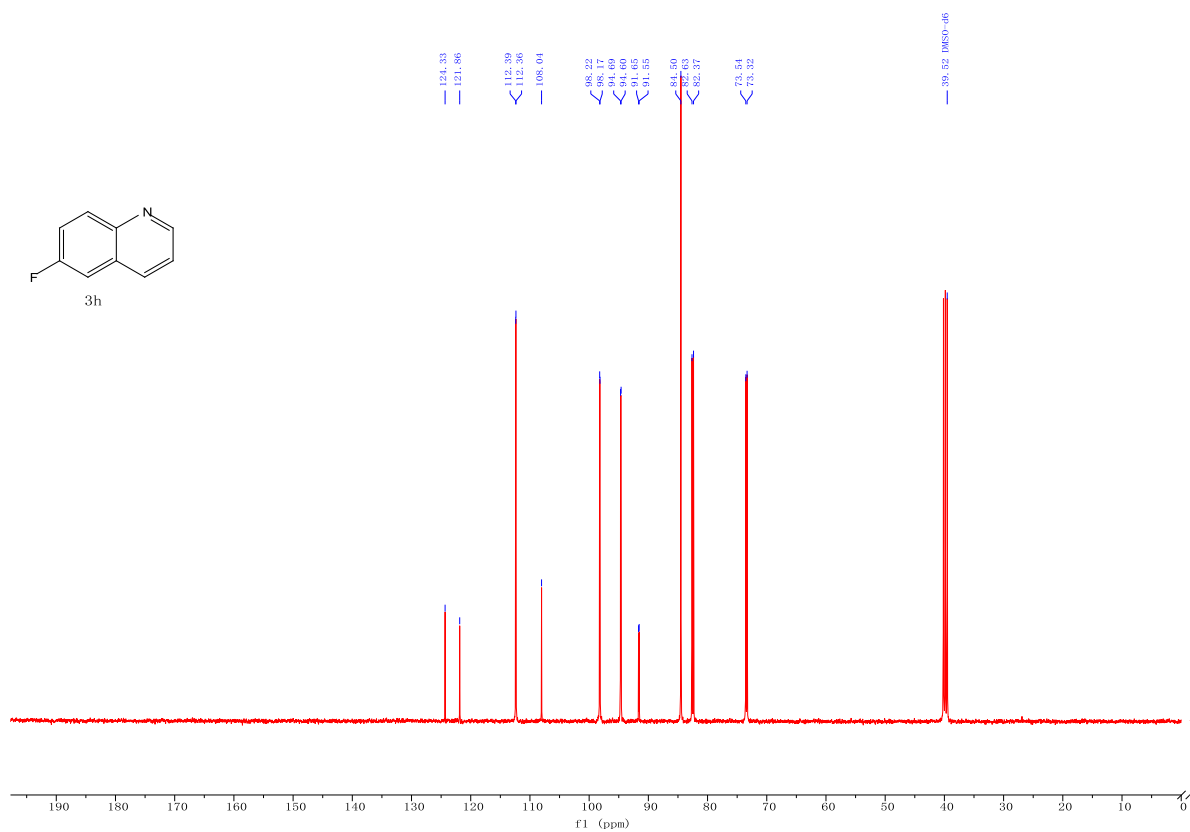

**6-chloroquinoline(3i):**

<sup>1</sup>H NMR, 400 MHz, CDCl<sub>3</sub>

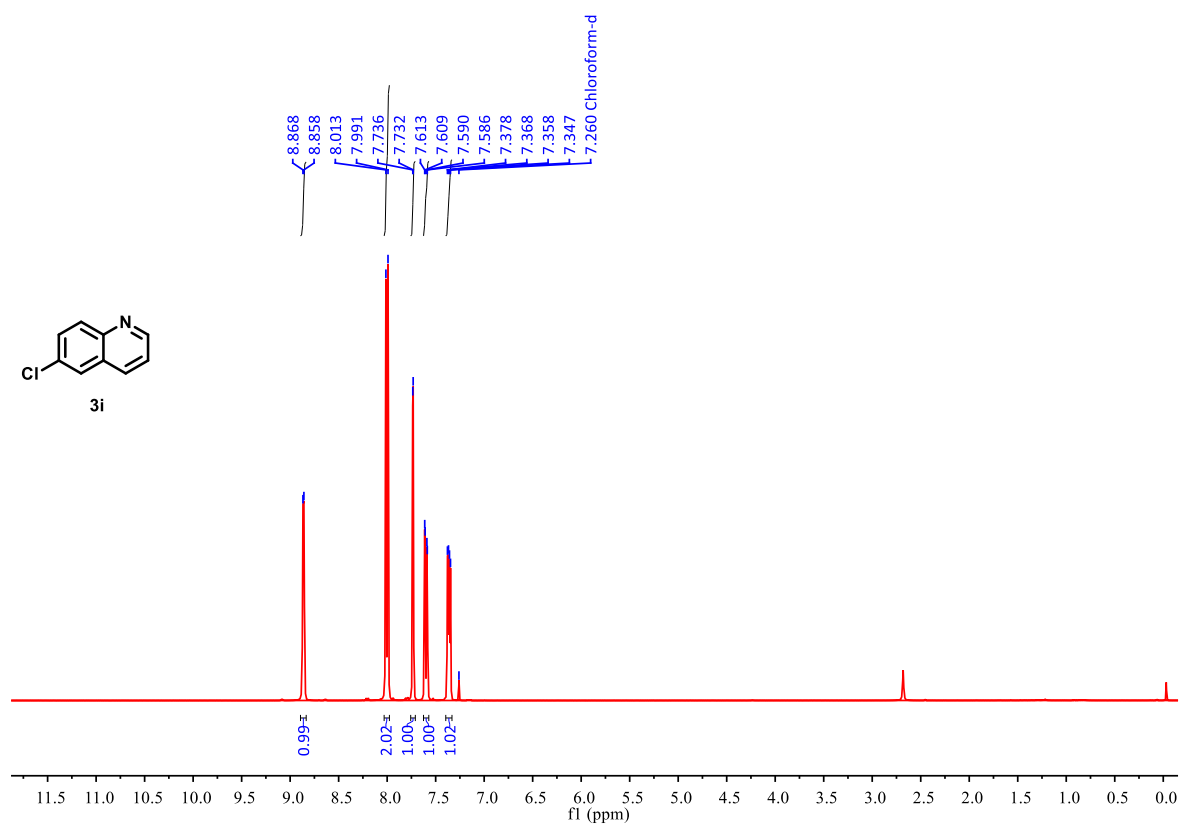

**<sup>13</sup>C NMR, 101 MHz, CDCl<sub>3</sub>**

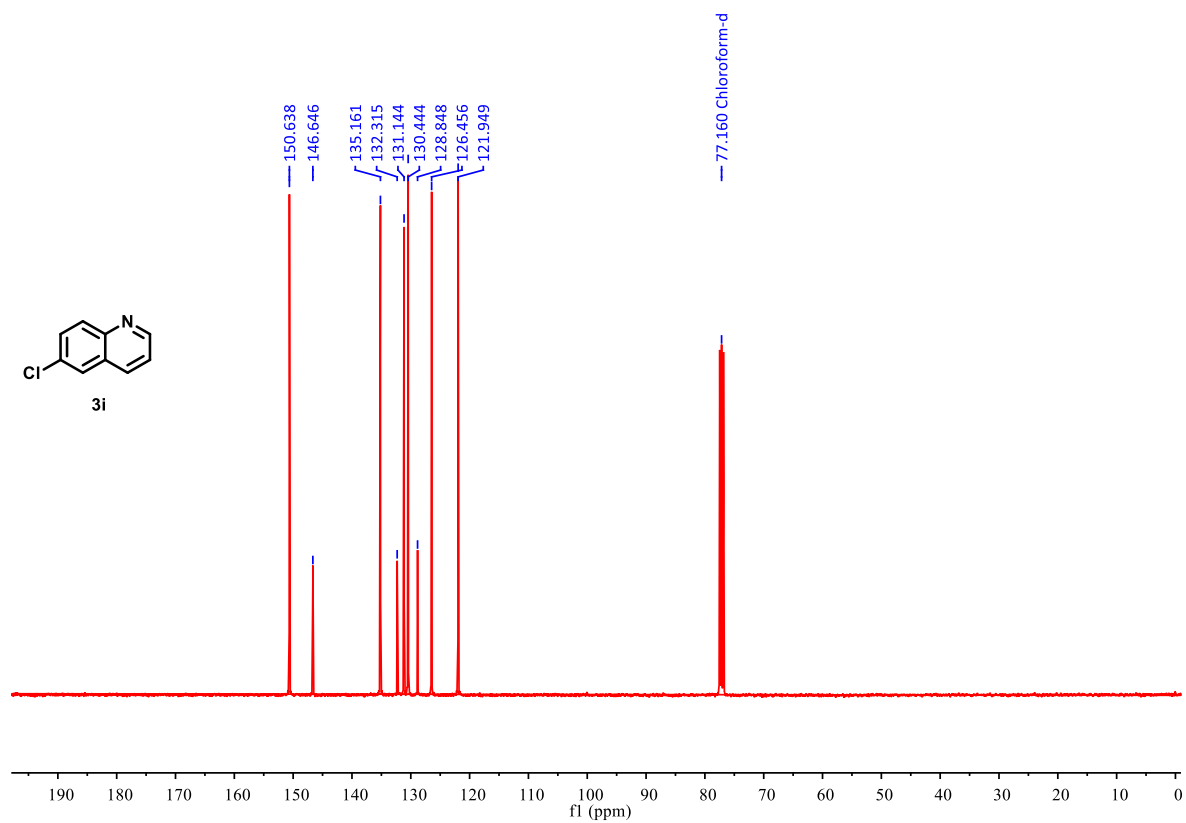

**6-bromoquinoline(3j):**

**<sup>1</sup>H NMR, 400 MHz, CDCl<sub>3</sub>**

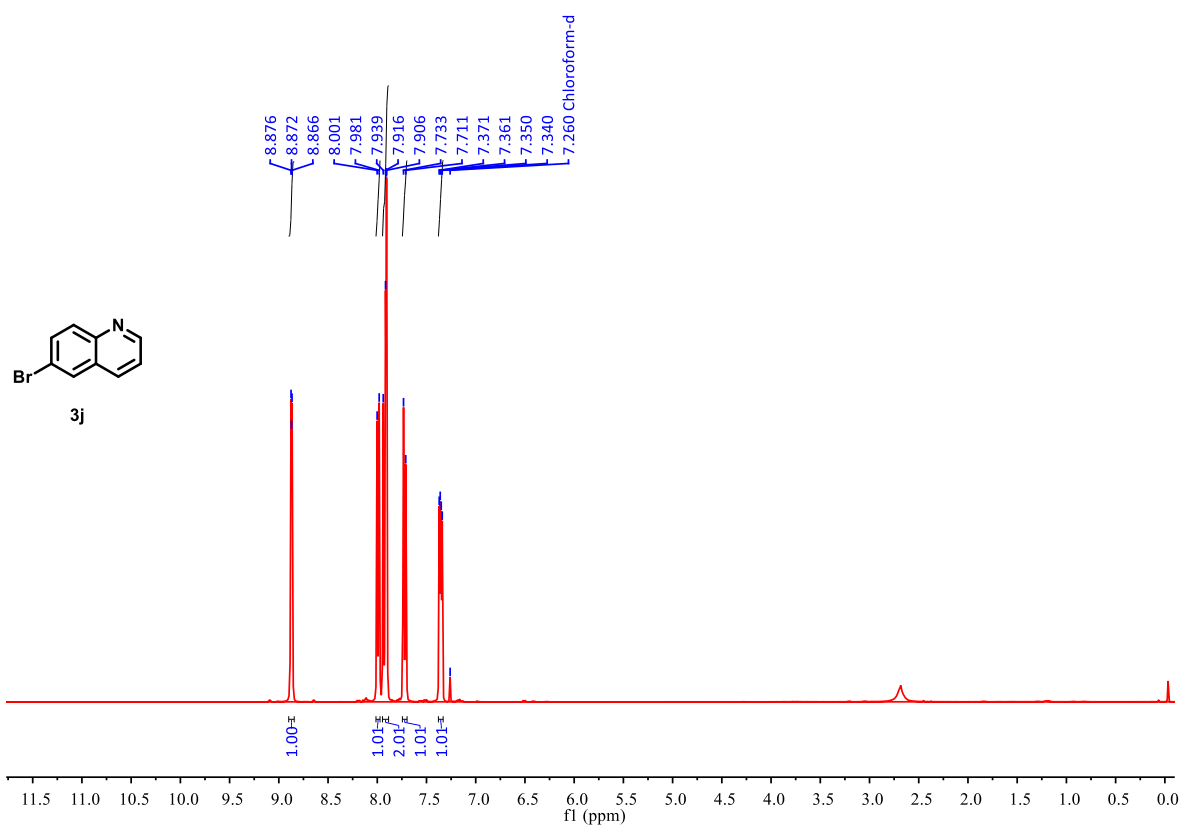

**<sup>13</sup>C NMR, 101 MHz, CDCl<sub>3</sub>**

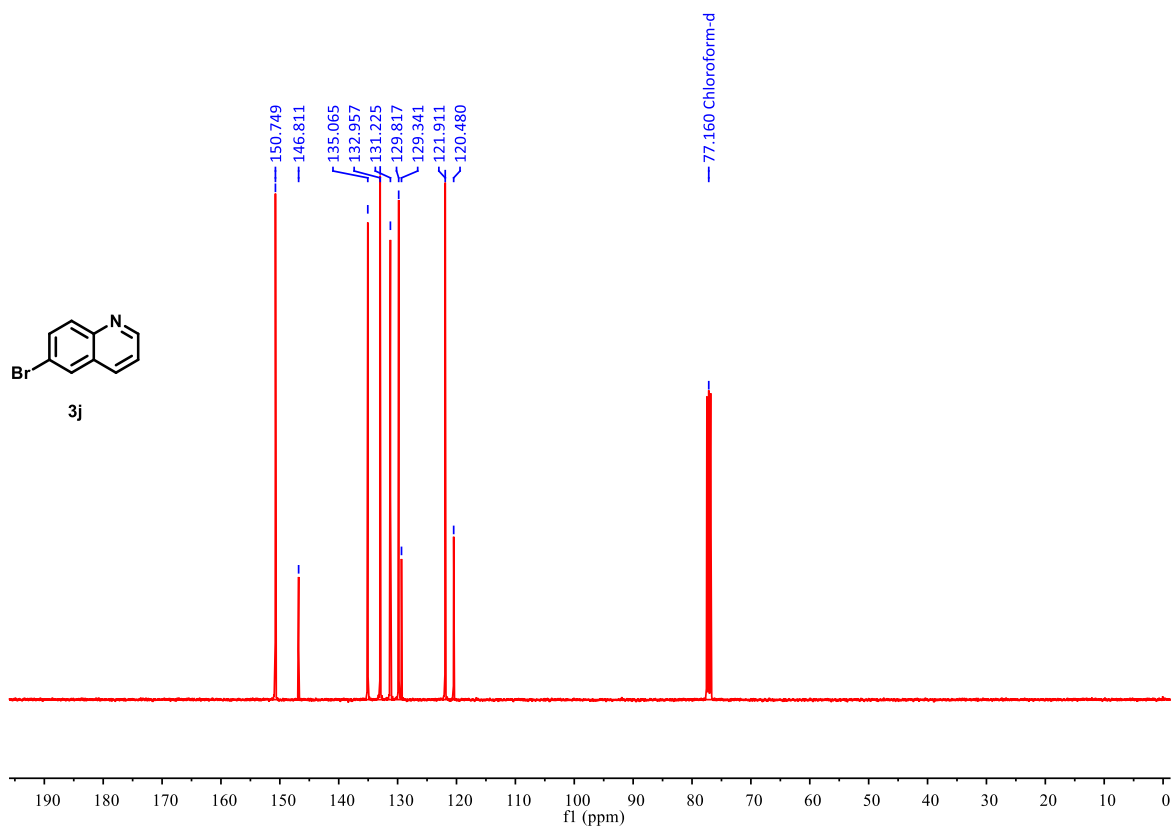

**quinoline-6-carbonitrile(3k):**

**<sup>1</sup>H NMR, 400 MHz, CDCl<sub>3</sub>**

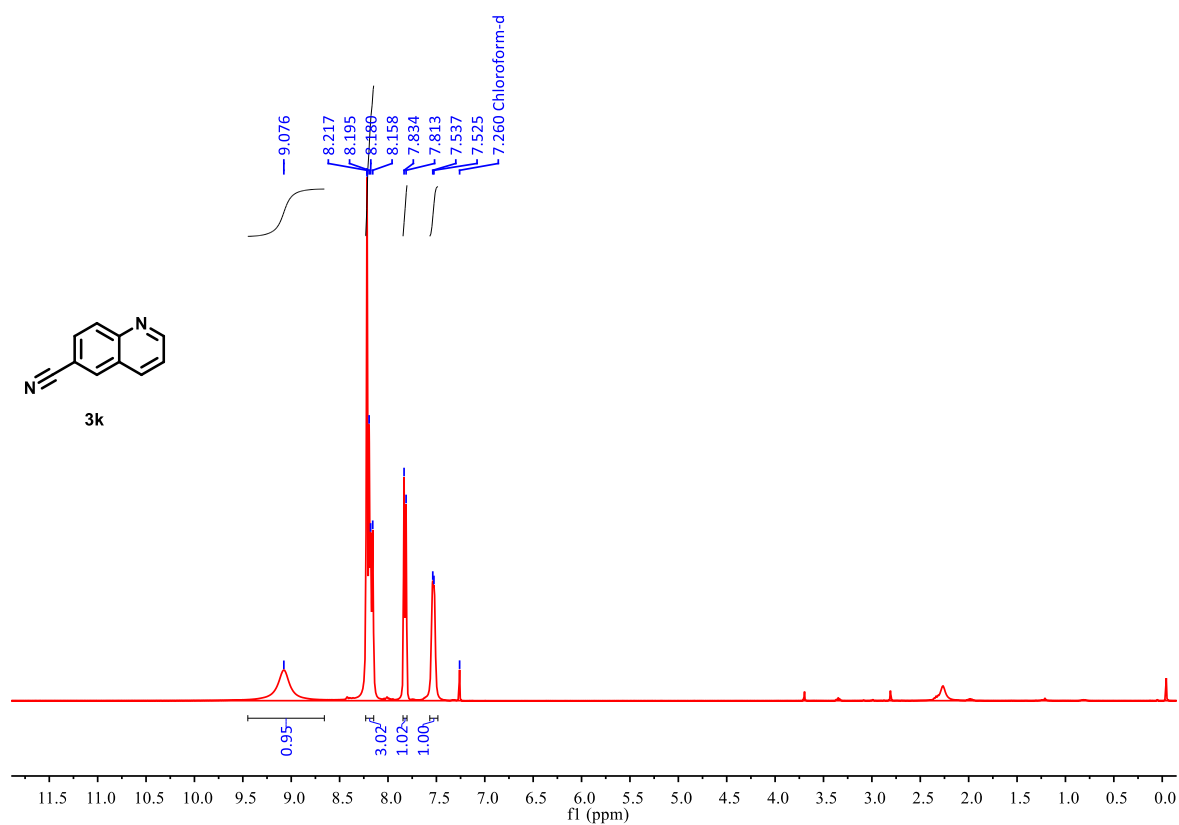

**<sup>13</sup>C NMR, 101 MHz, CDCl<sub>3</sub>**

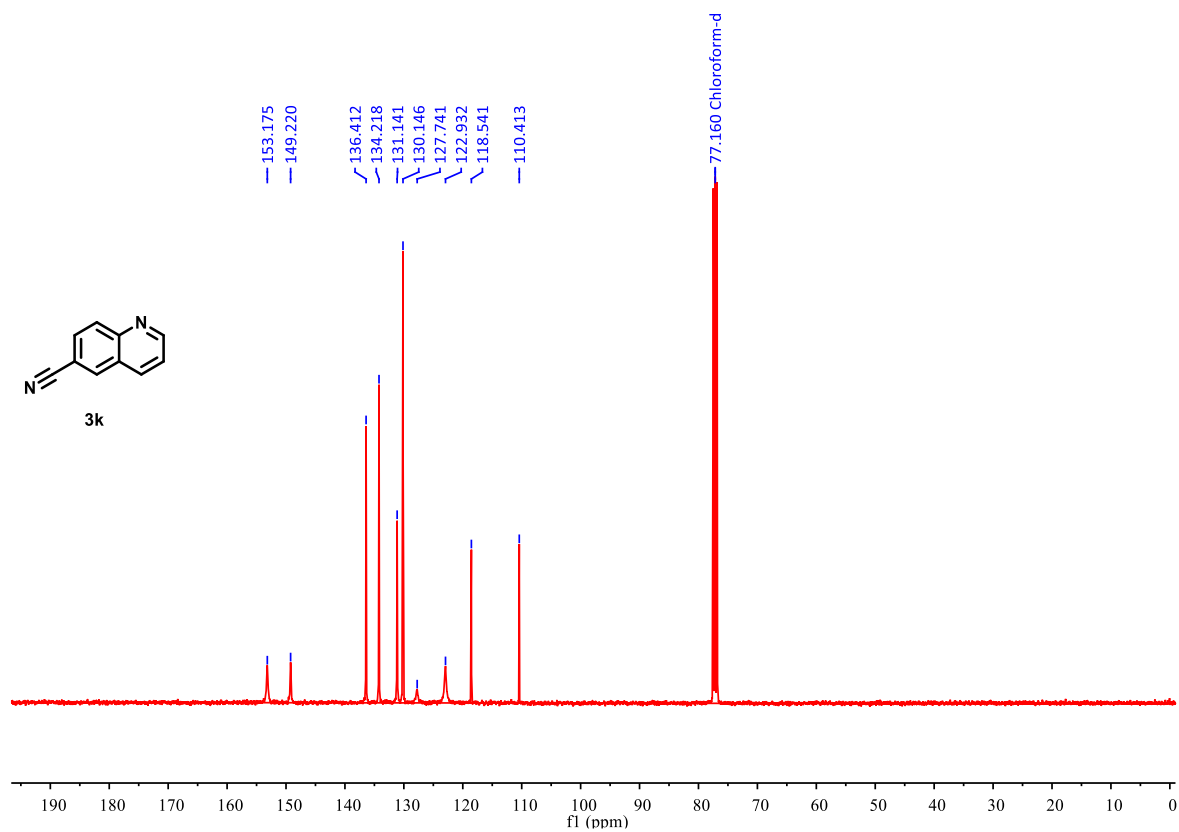

**6-(trifluoromethyl)quinoline(3l):**

**<sup>1</sup>H NMR, 400 MHz, CDCl<sub>3</sub>**

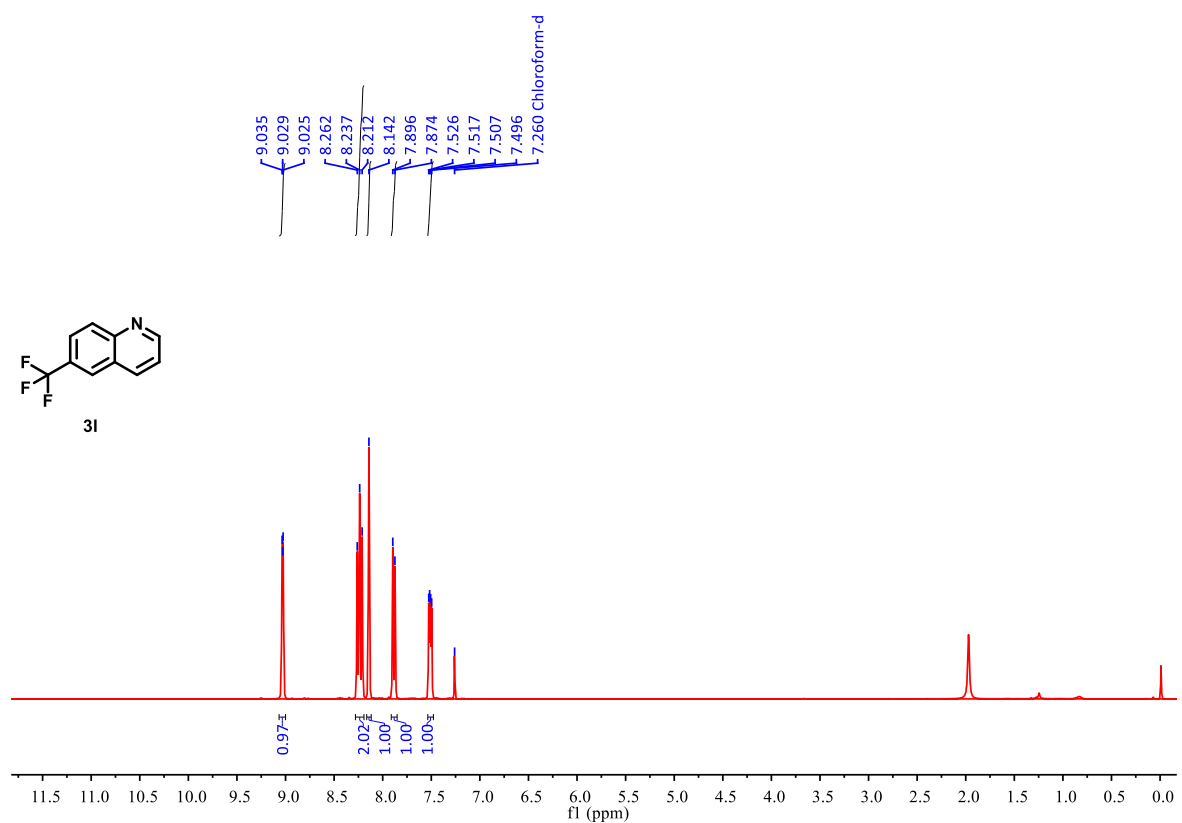

**<sup>13</sup>C NMR, 101 MHz, CDCl<sub>3</sub>**

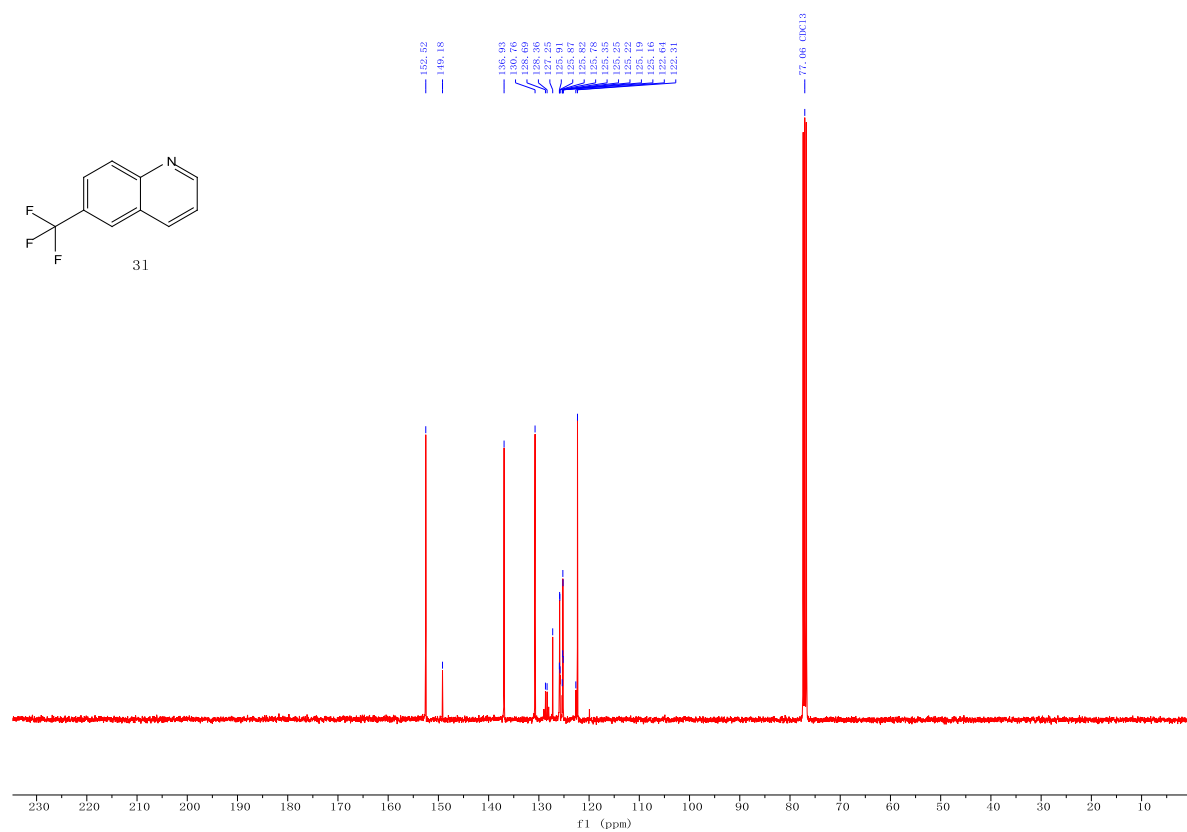

**6-phenylquinoline(3m):**

**<sup>1</sup>H NMR, 400 MHz, CDCl<sub>3</sub>**

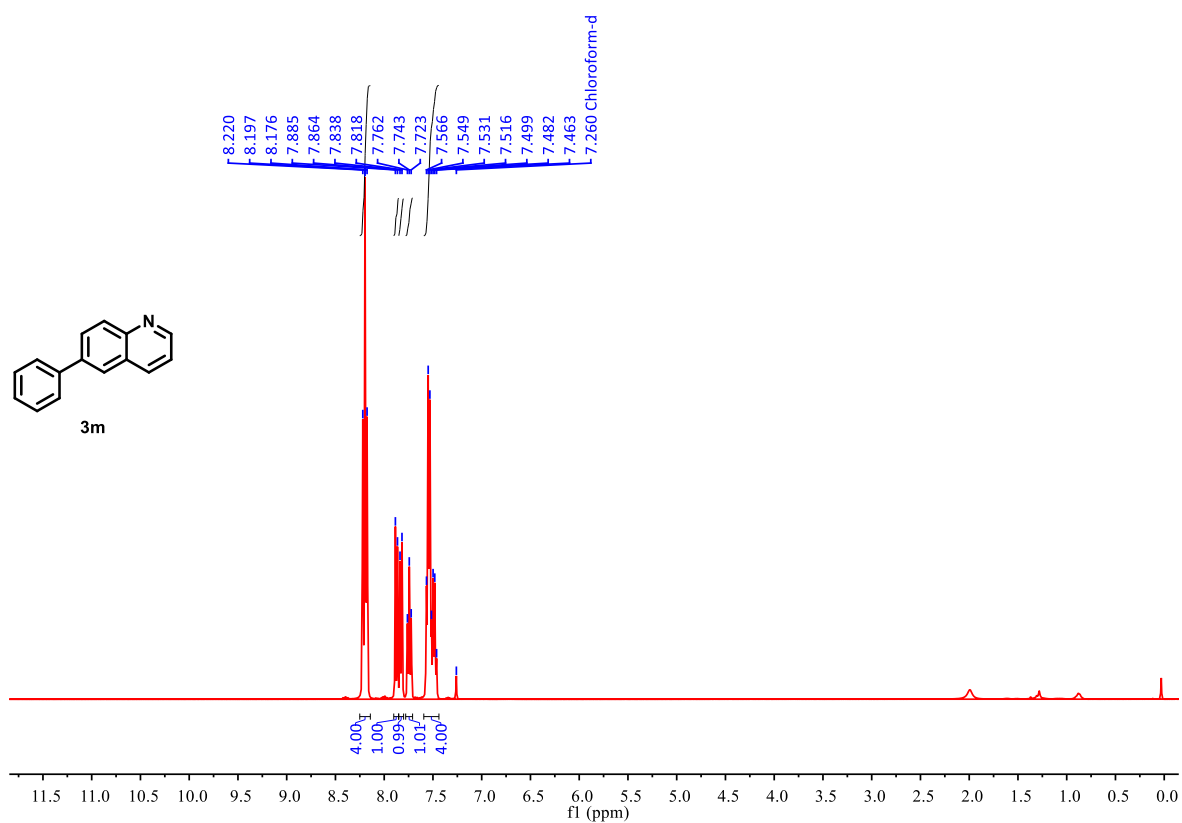

<sup>13</sup>C NMR, 101 MHz, CDCl<sub>3</sub>

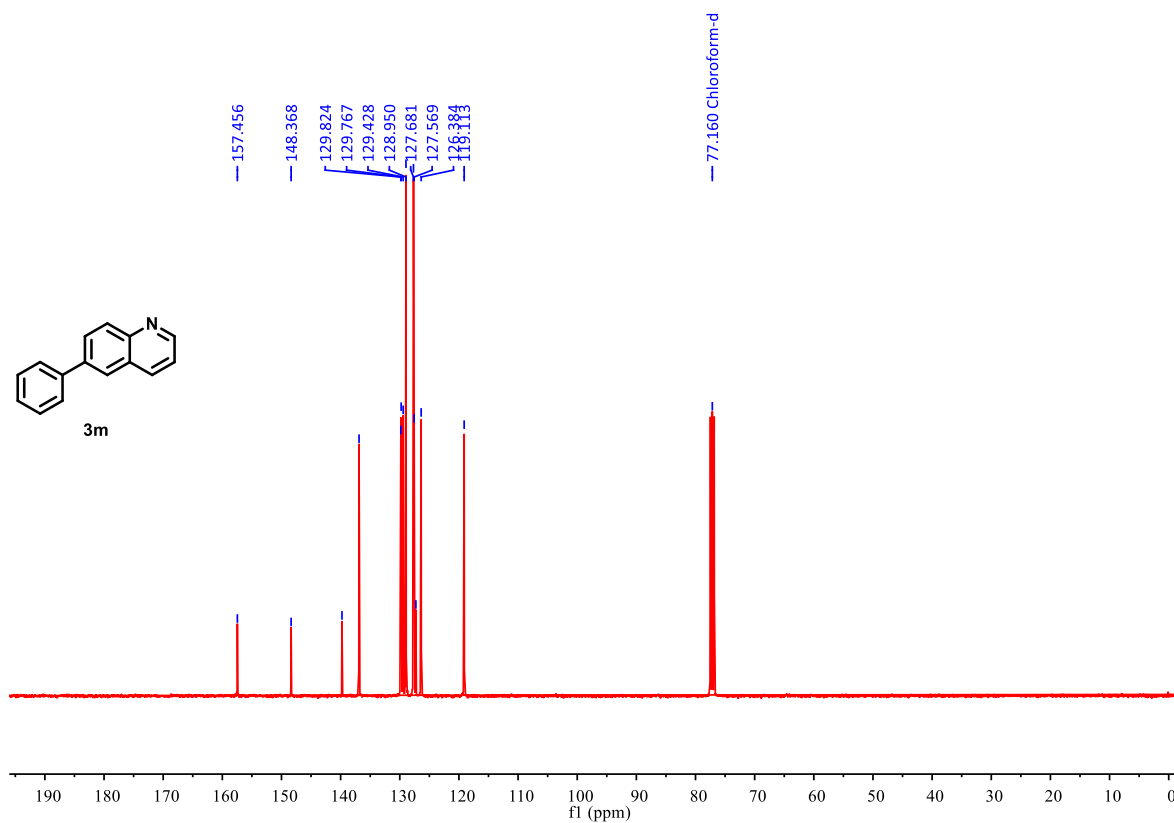

**7-methylquinoline(3n):**

<sup>1</sup>H NMR, 400 MHz, CDCl<sub>3</sub>

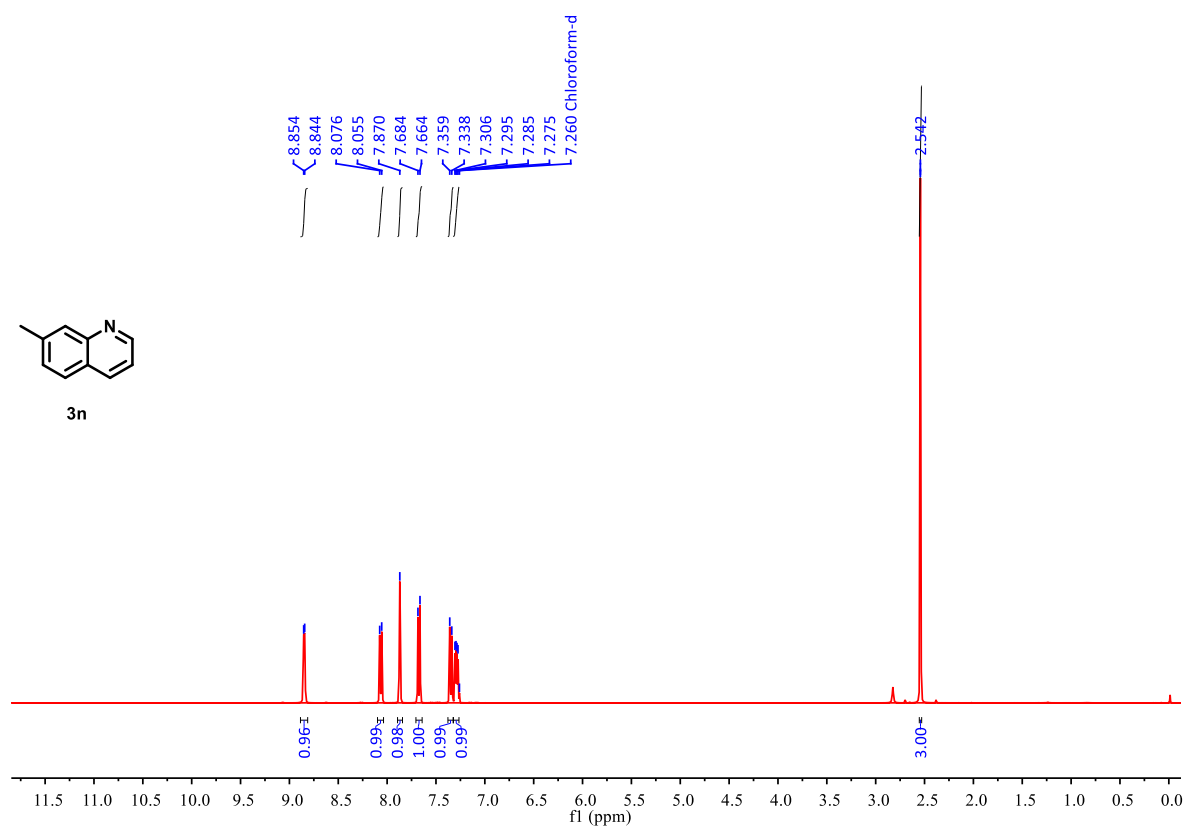

<sup>13</sup>C NMR, 101 MHz, CDCl<sub>3</sub>

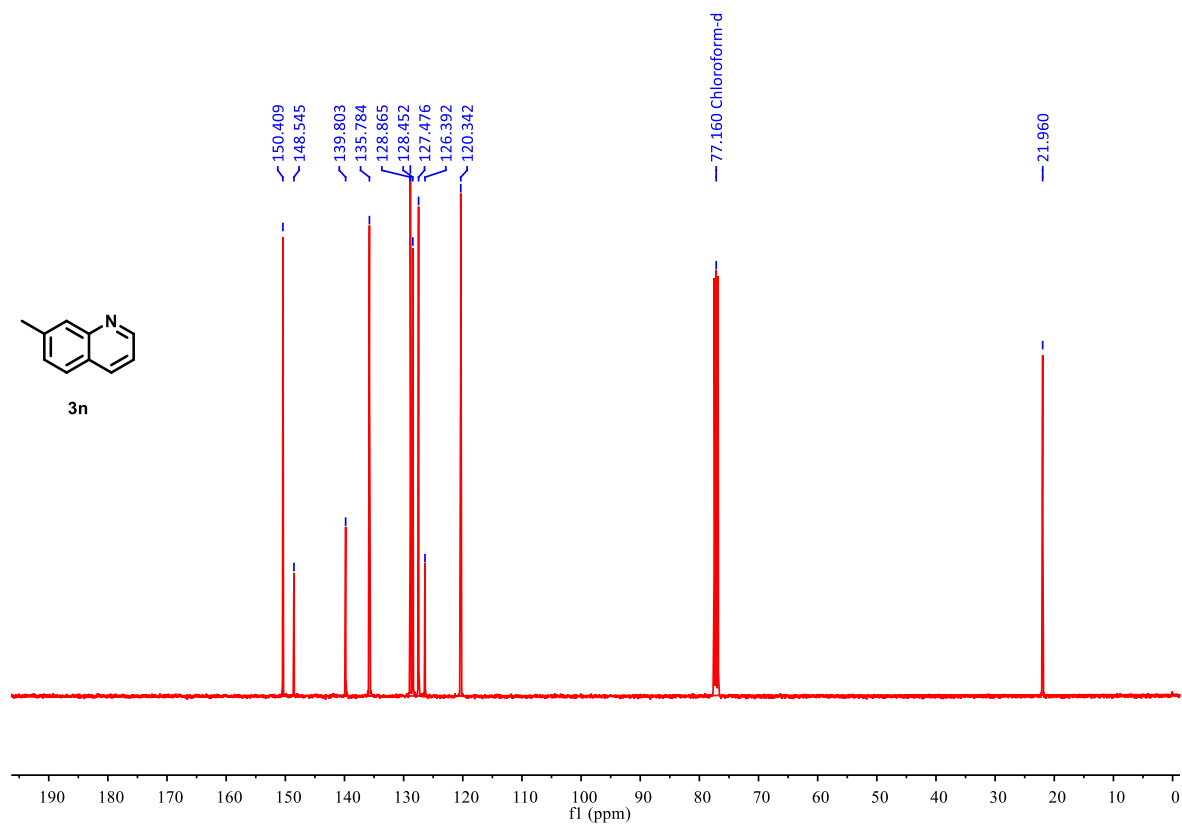

**7-methoxyquinoline(3o):**

<sup>1</sup>H NMR, 400 MHz, CDCl<sub>3</sub>

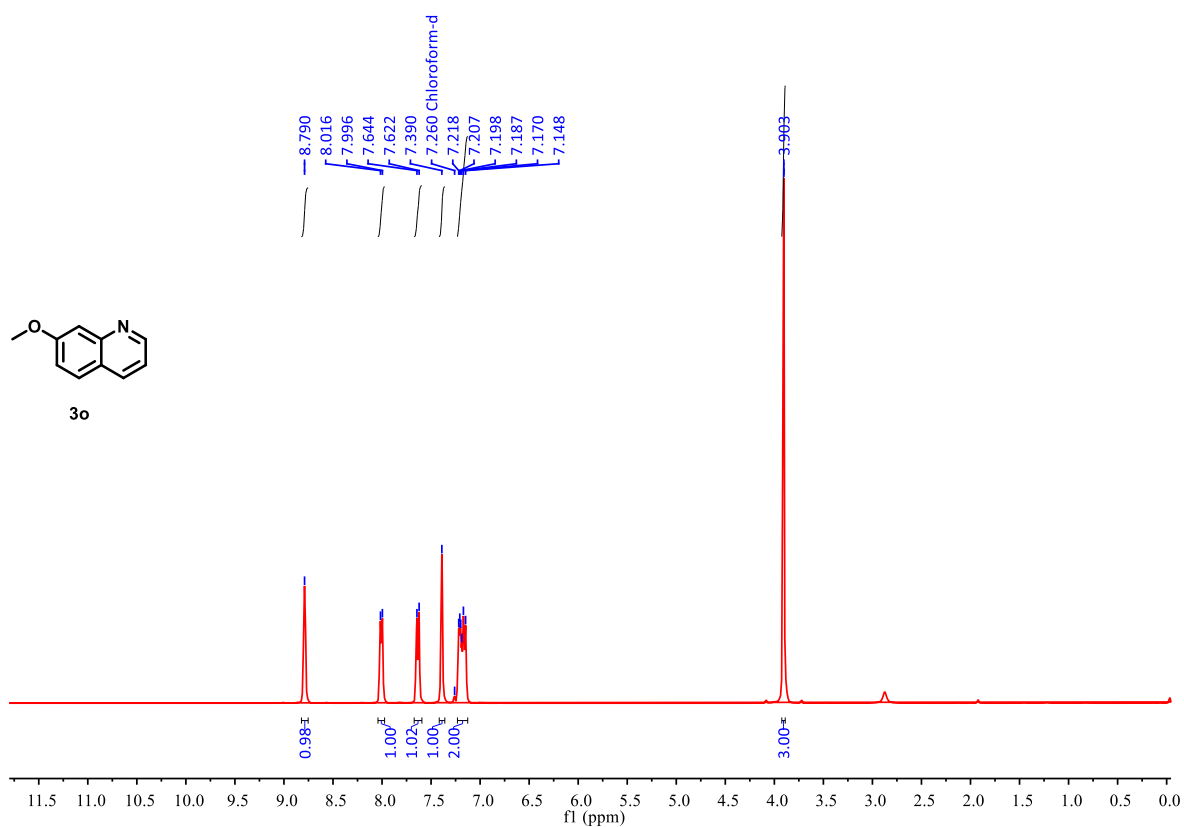

<sup>13</sup>C NMR, 101 MHz, CDCl<sub>3</sub>

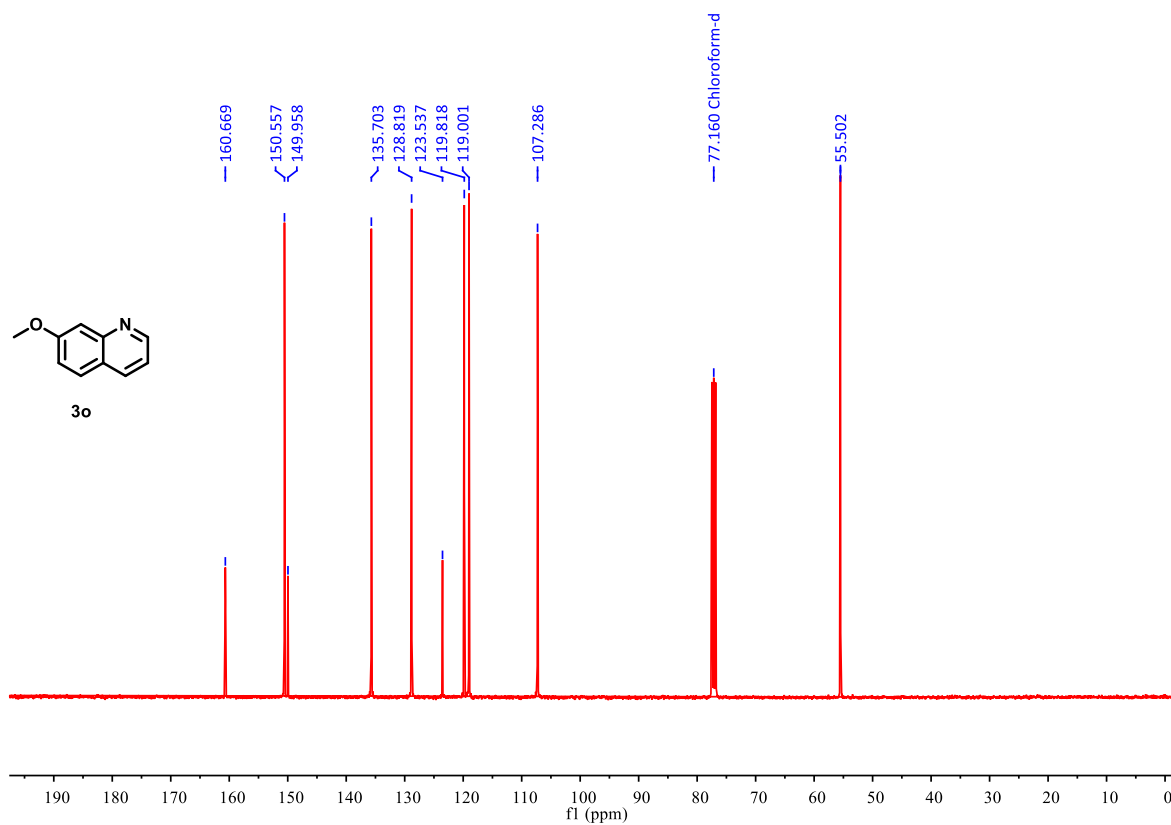

**7-chloroquinoline(3p):**

<sup>1</sup>H NMR, 400 MHz, CDCl<sub>3</sub>



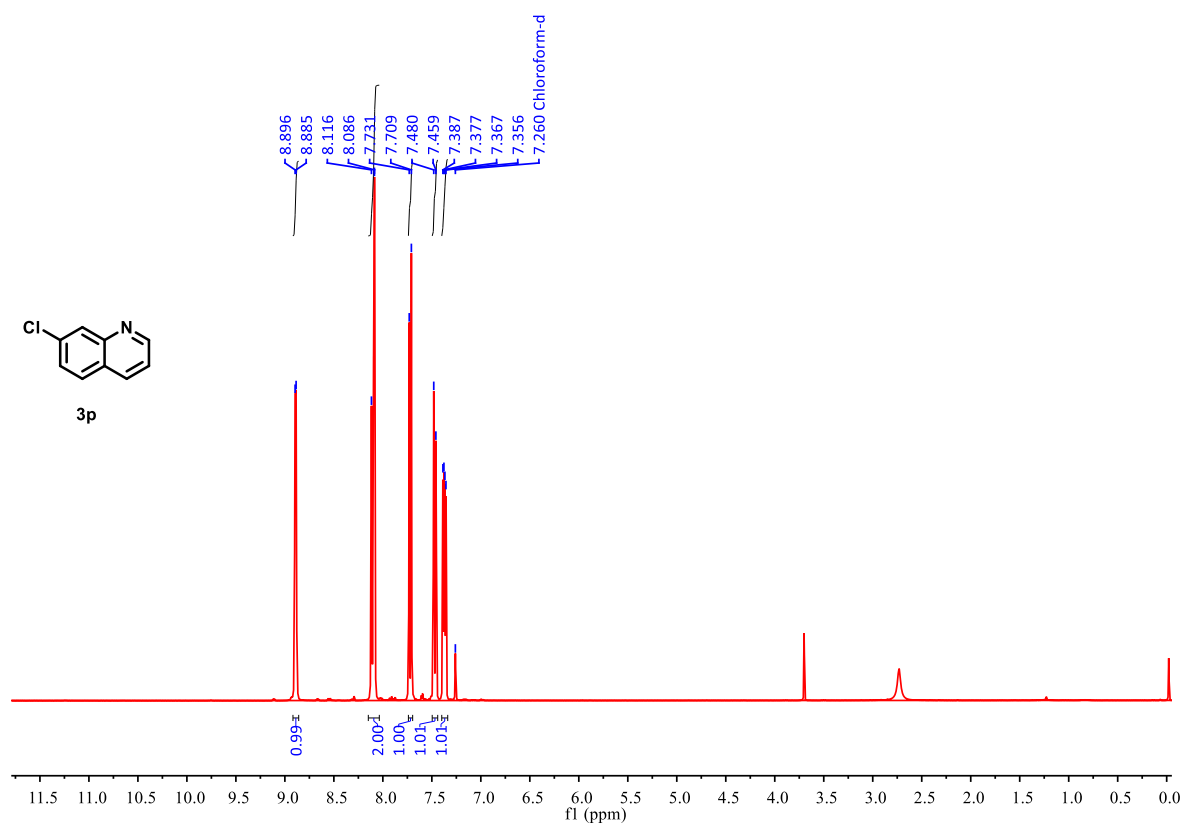

<sup>13</sup>C NMR, 101 MHz, CDCl<sub>3</sub>

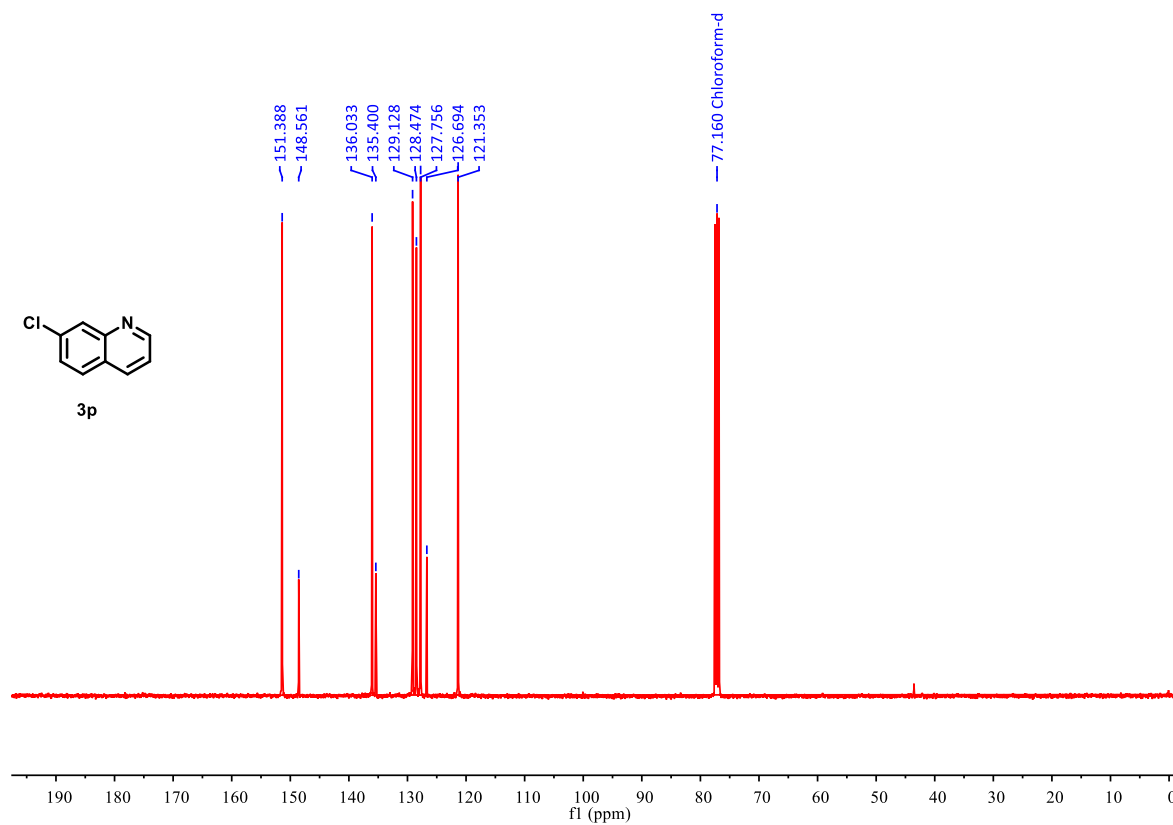

**8-methylquinoline(3q):**

<sup>1</sup>H NMR, 400 MHz, CDCl<sub>3</sub>

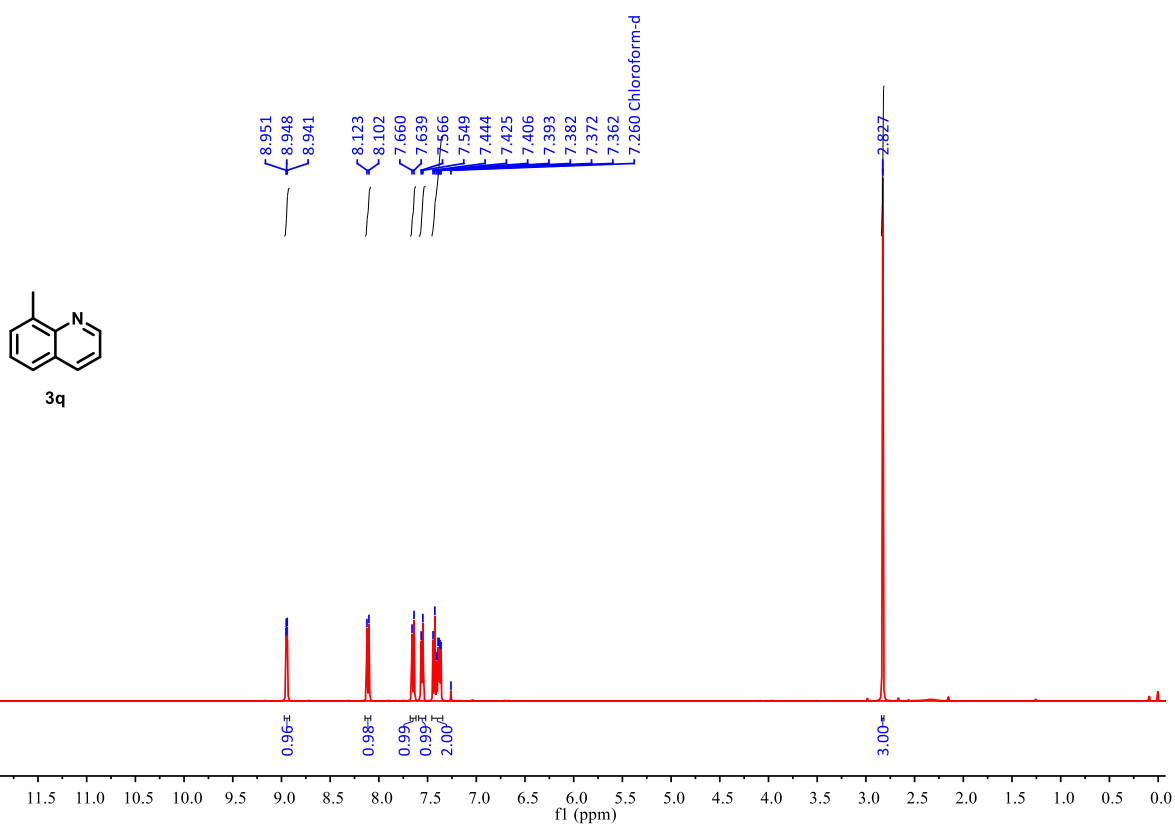

<sup>13</sup>C NMR, 101 MHz, CDCl<sub>3</sub>

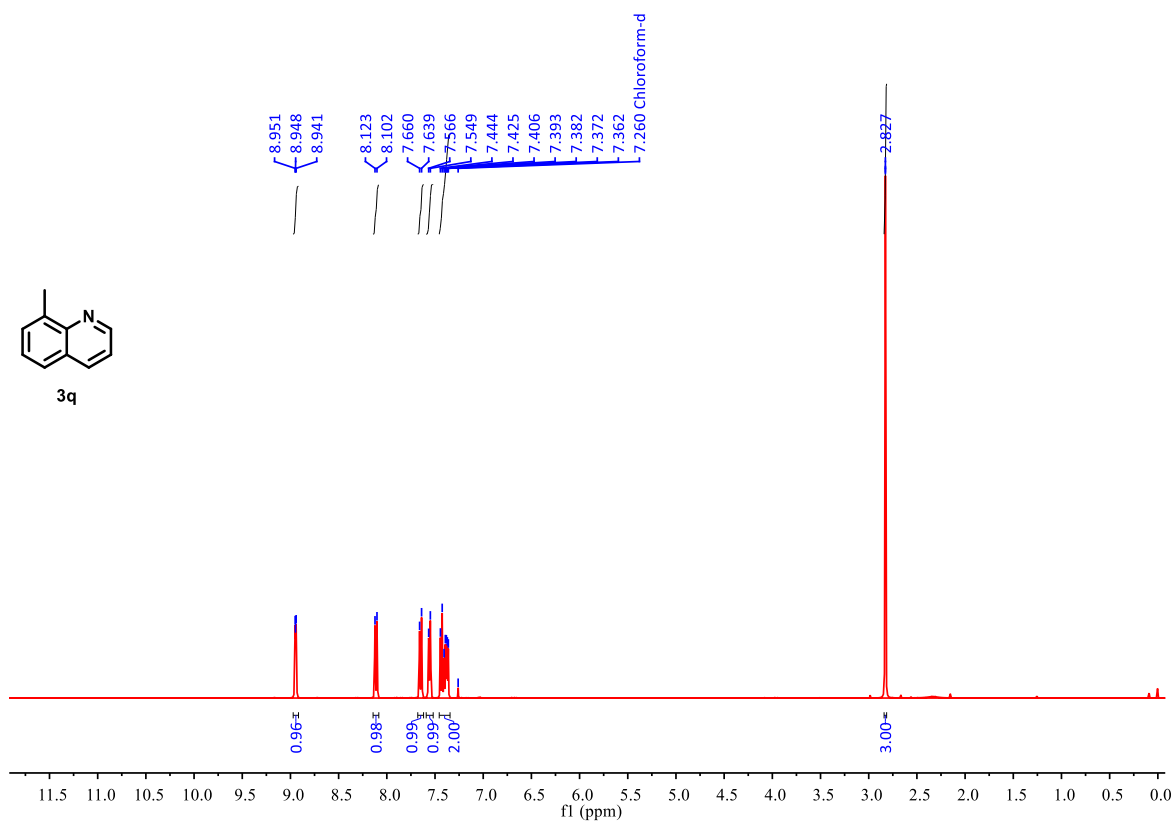

**8-methoxyquinoline(3r):**

<sup>1</sup>H NMR, 400 MHz, CDCl<sub>3</sub>

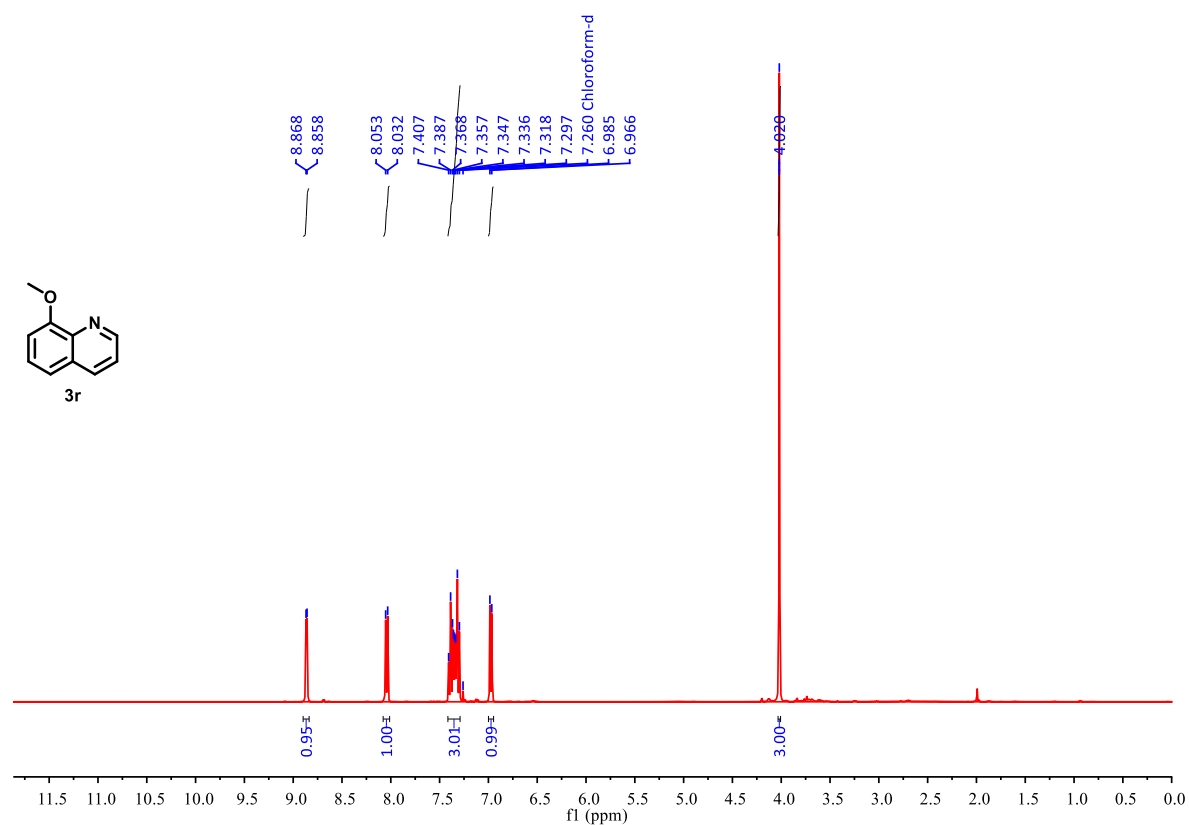

<sup>13</sup>C NMR, 101 MHz, CDCl<sub>3</sub>

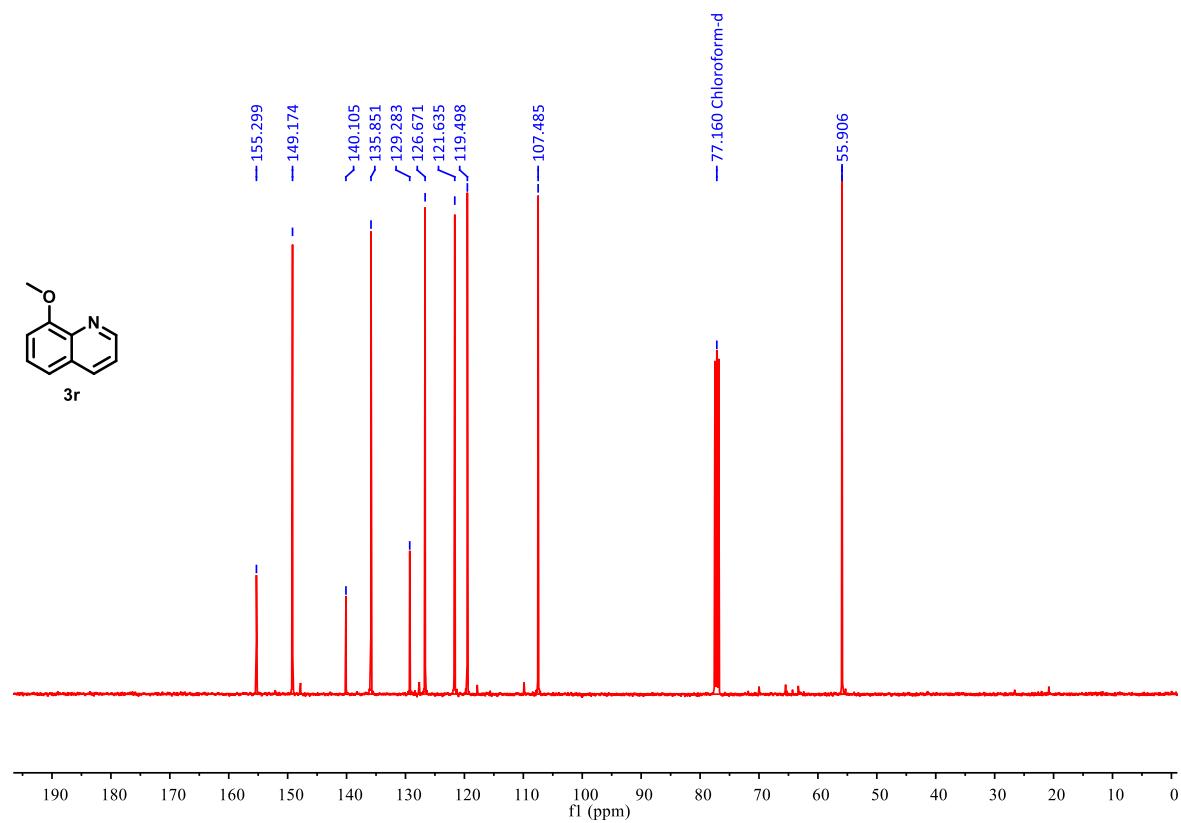

**8-chloroquinoline(3s):**

<sup>1</sup>H NMR, 400 MHz, CDCl<sub>3</sub>

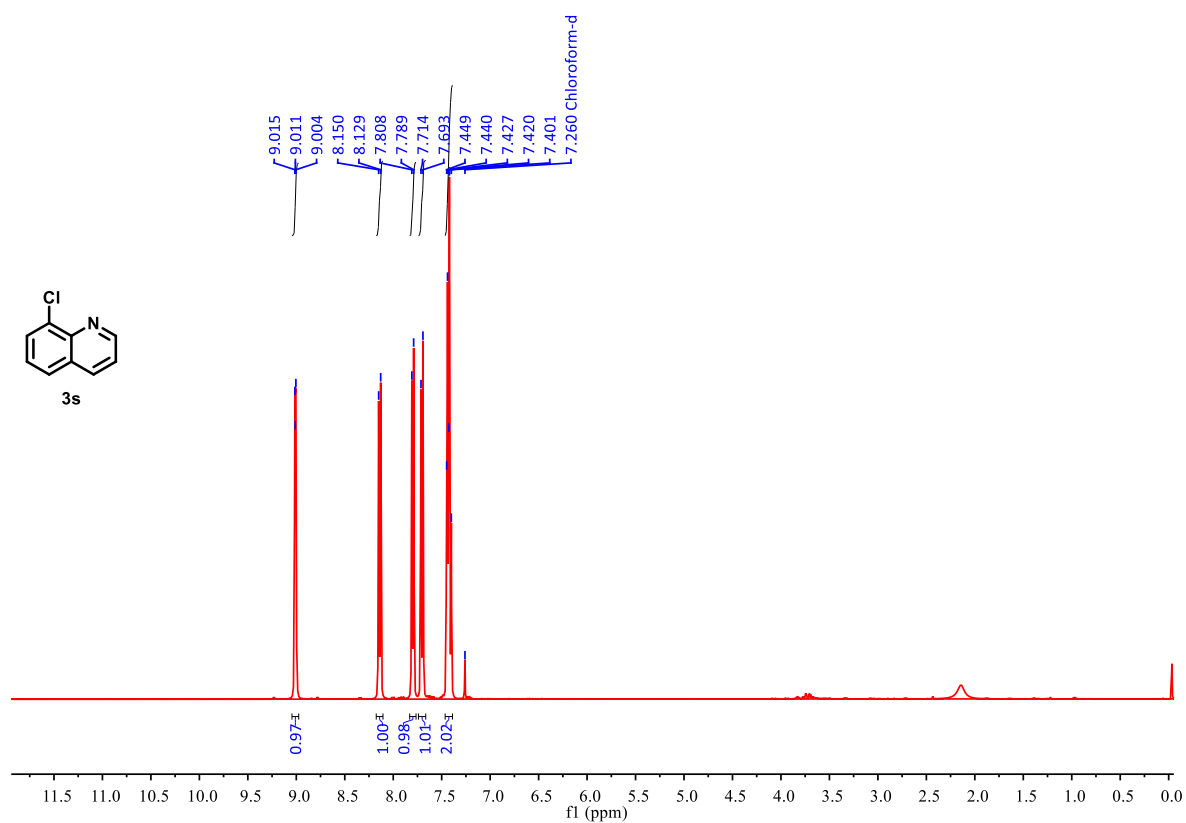

<sup>13</sup>C NMR, 101 MHz, CDCl<sub>3</sub>

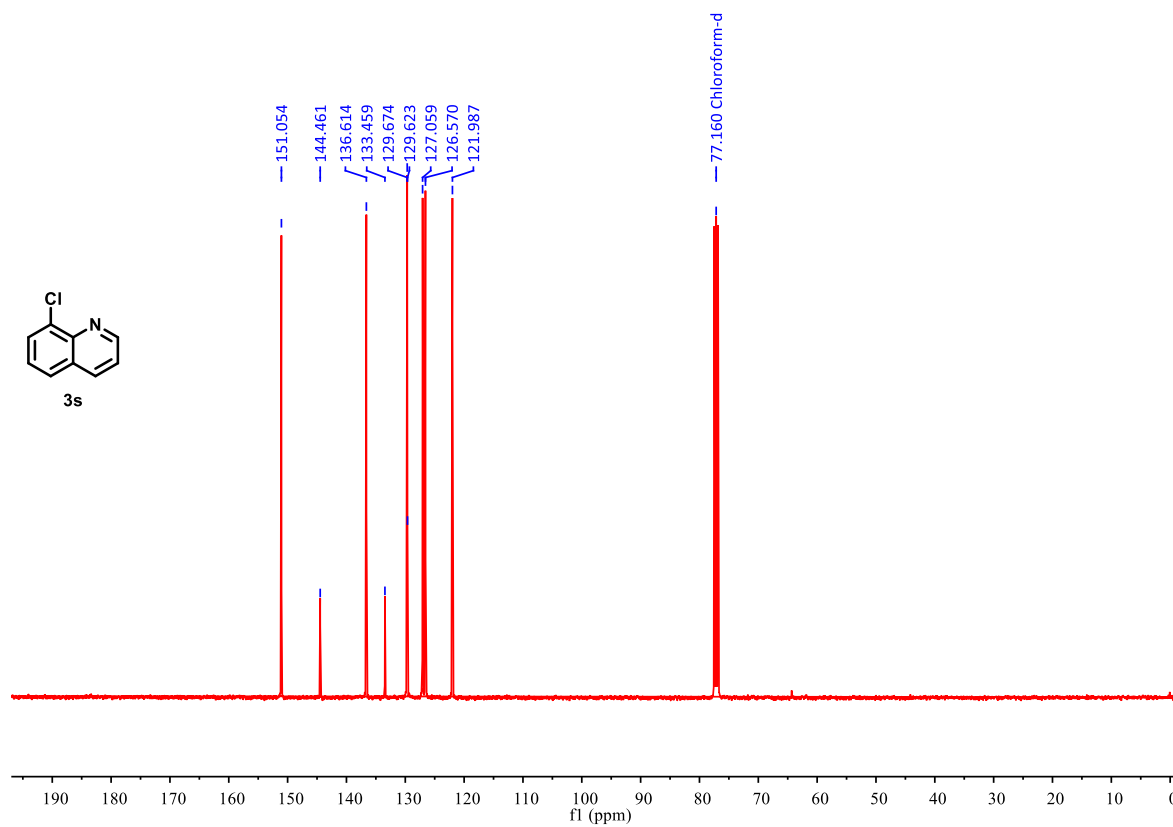

**2-methylquinoline(3t):**

<sup>1</sup>H NMR, 400 MHz, CDCl<sub>3</sub>

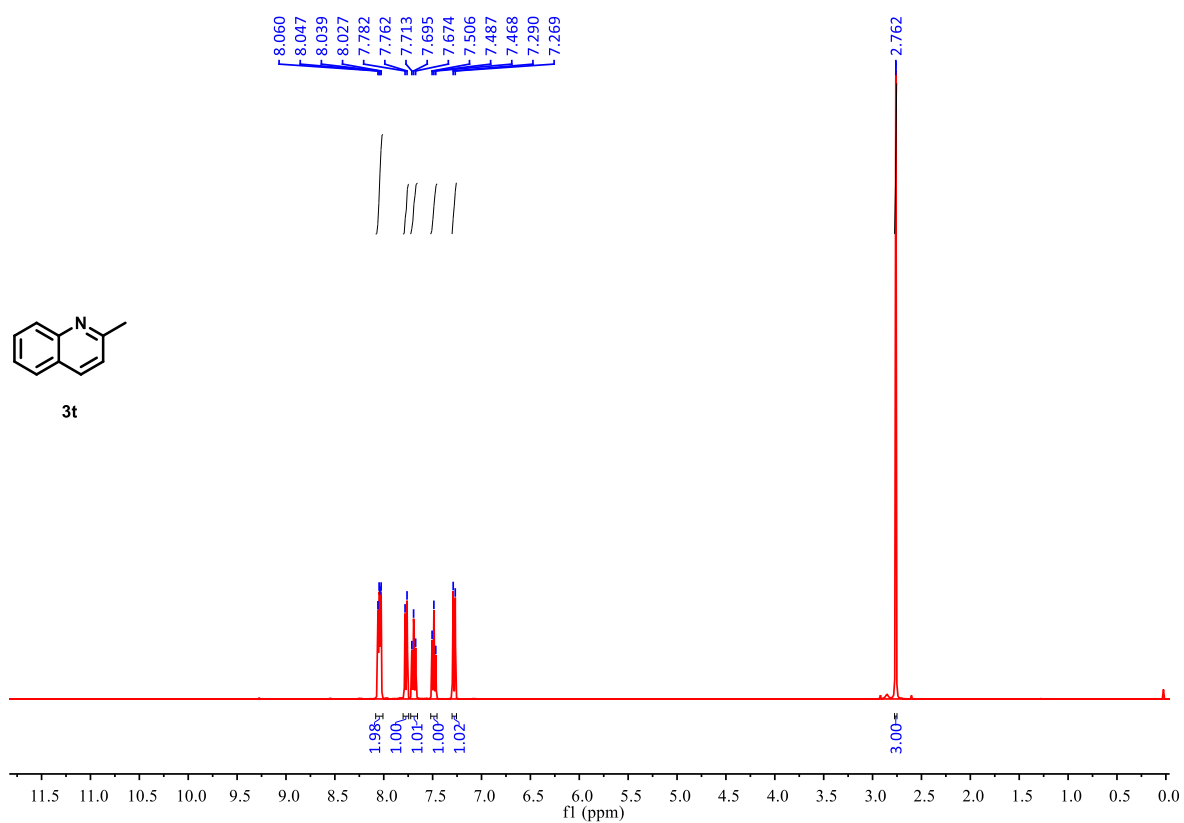

<sup>13</sup>C NMR, 101 MHz, CDCl<sub>3</sub>

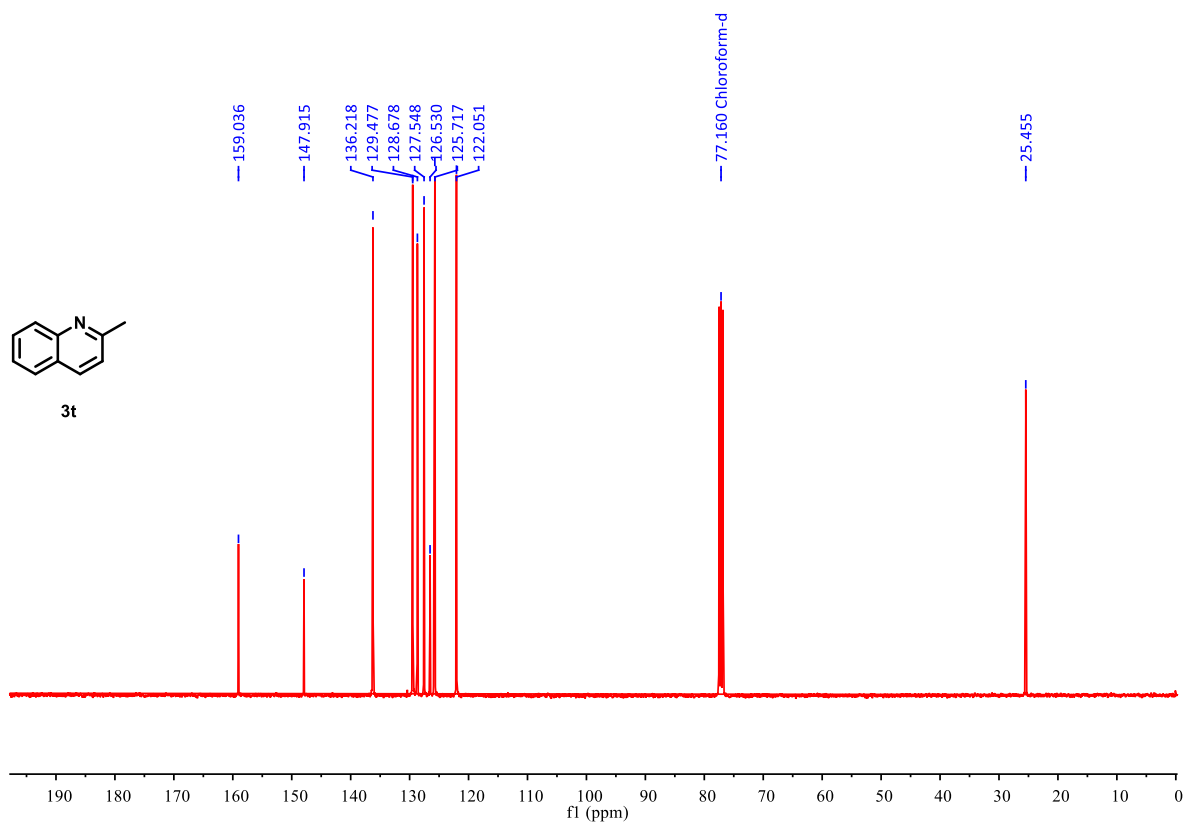

**2,6-dimethylquinoline(3u):**

<sup>1</sup>H NMR, 400 MHz, CDCl<sub>3</sub>

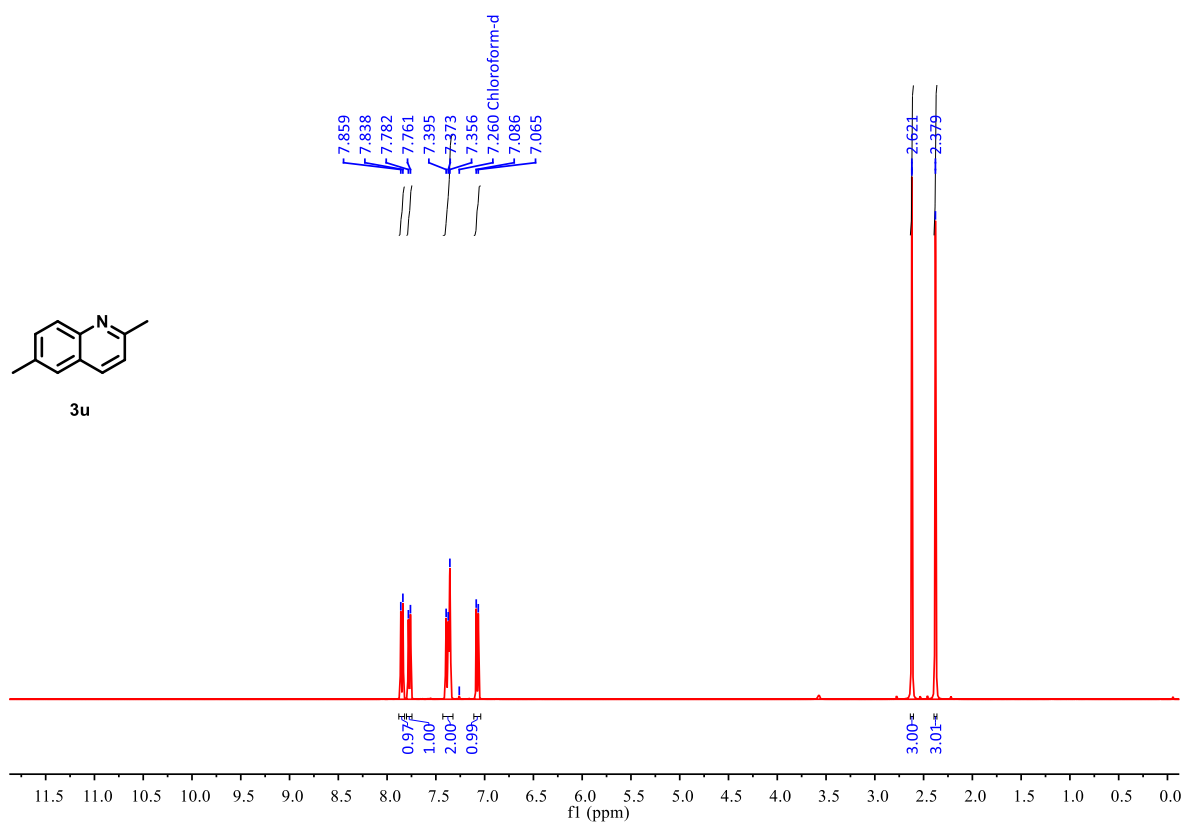

<sup>13</sup>C NMR, 101 MHz, CDCl<sub>3</sub>

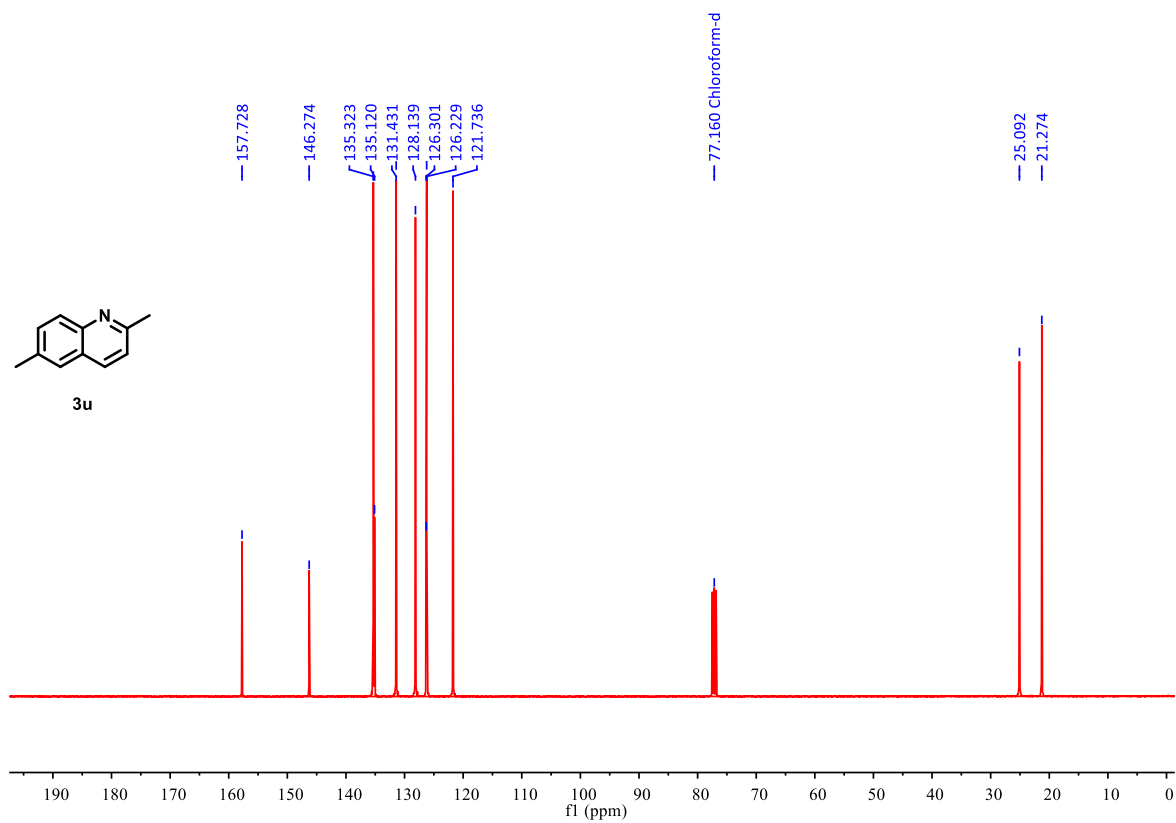

**2-methoxyquinoline(3v):**

<sup>1</sup>H NMR, 400 MHz, CDCl<sub>3</sub>

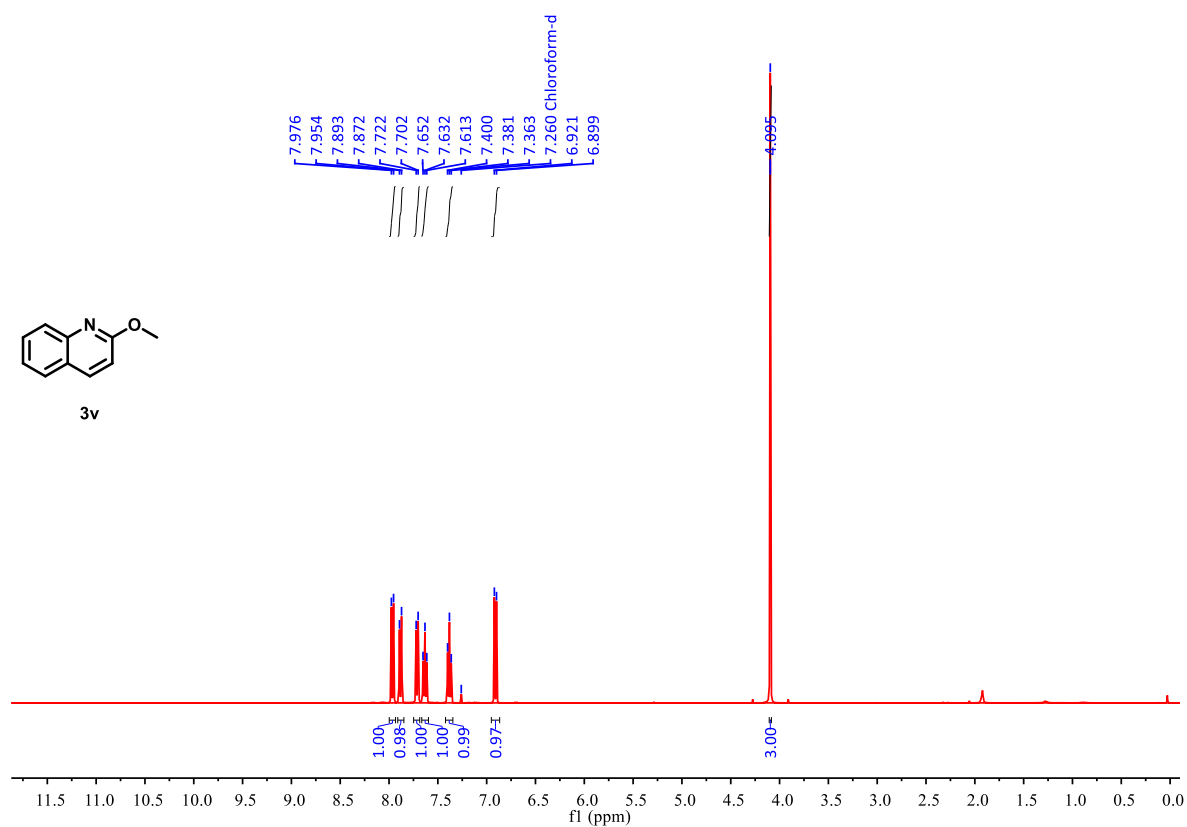

<sup>13</sup>C NMR, 101 MHz, CDCl<sub>3</sub>

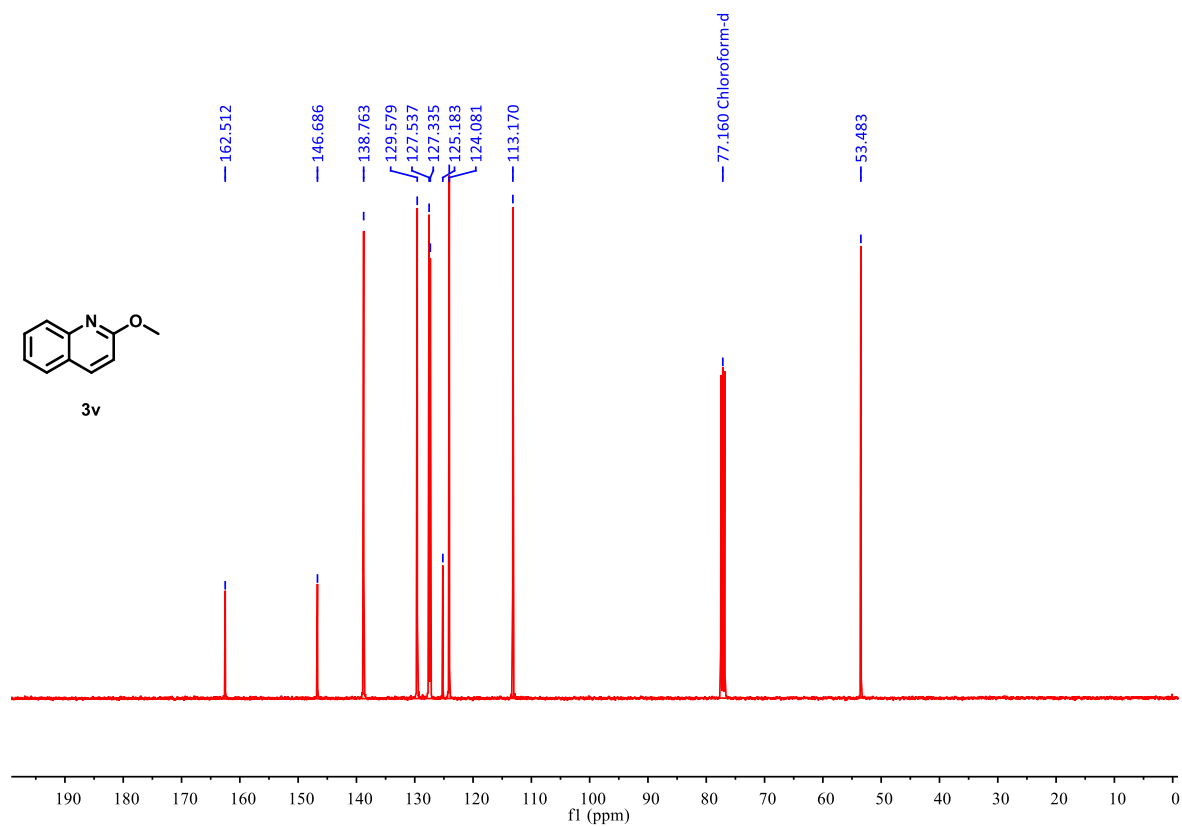

**N-methylquinolin-2-amine(3w):**

<sup>1</sup>H NMR, 400 MHz, CDCl<sub>3</sub>

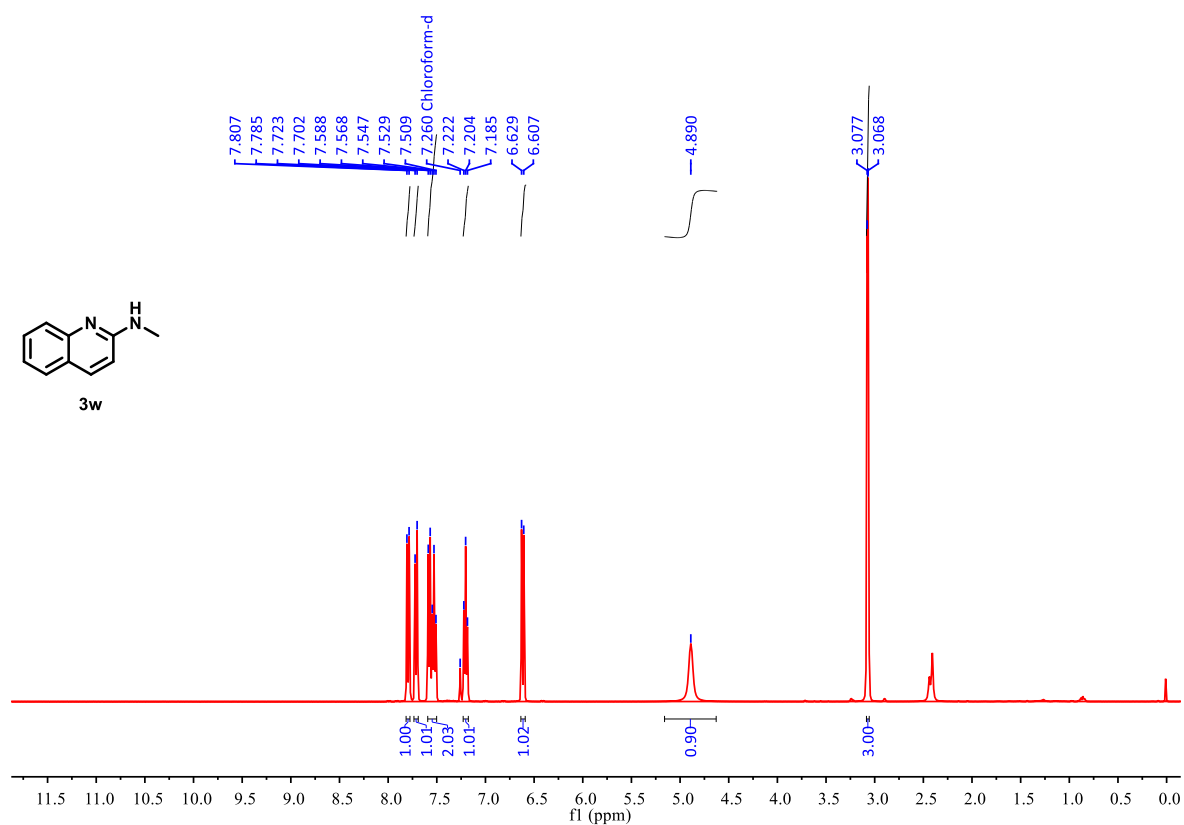

<sup>13</sup>C NMR, 101 MHz, CDCl<sub>3</sub>

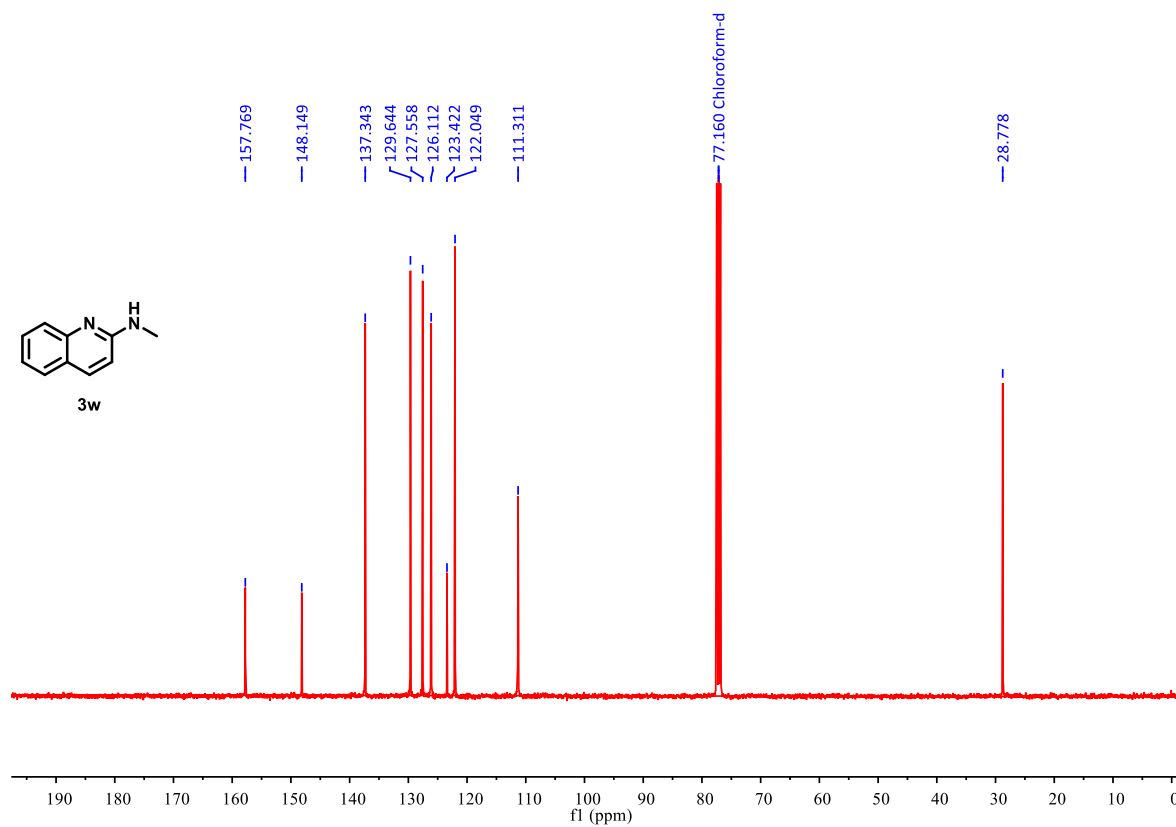

**2-phenylquinoline(3x):**

<sup>1</sup>H NMR, 400 MHz, CDCl<sub>3</sub>



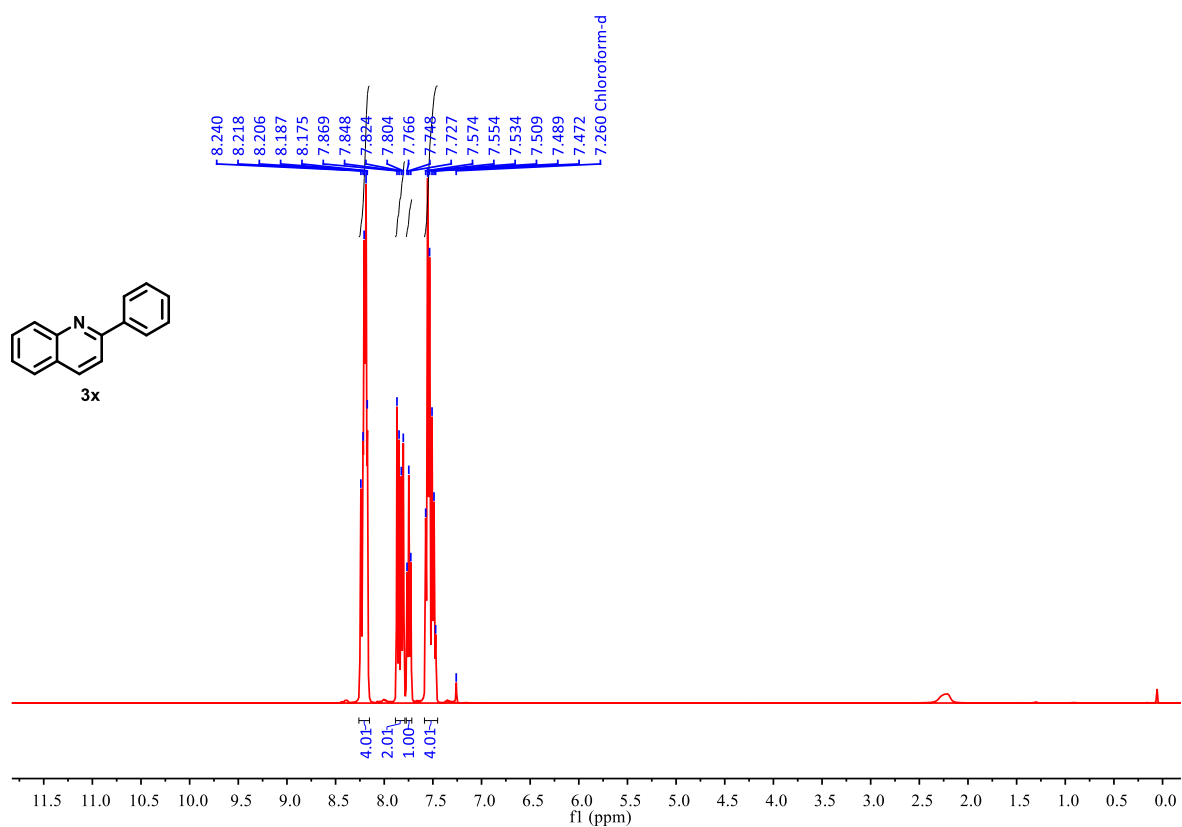

**<sup>13</sup>C NMR, 101 MHz, CDCl<sub>3</sub>**

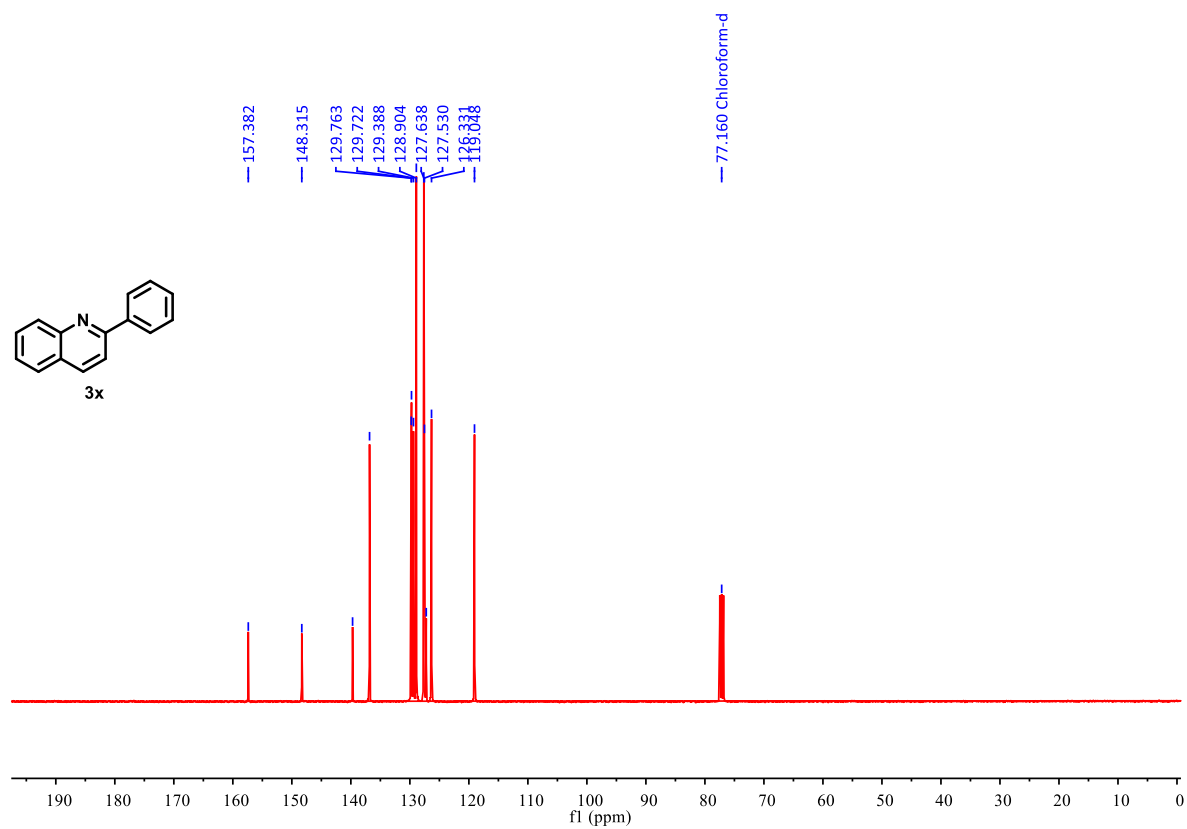

**N-phenylacetamide( 5a ):**

**<sup>1</sup>H NMR, 400 MHz, CDCl<sub>3</sub>**

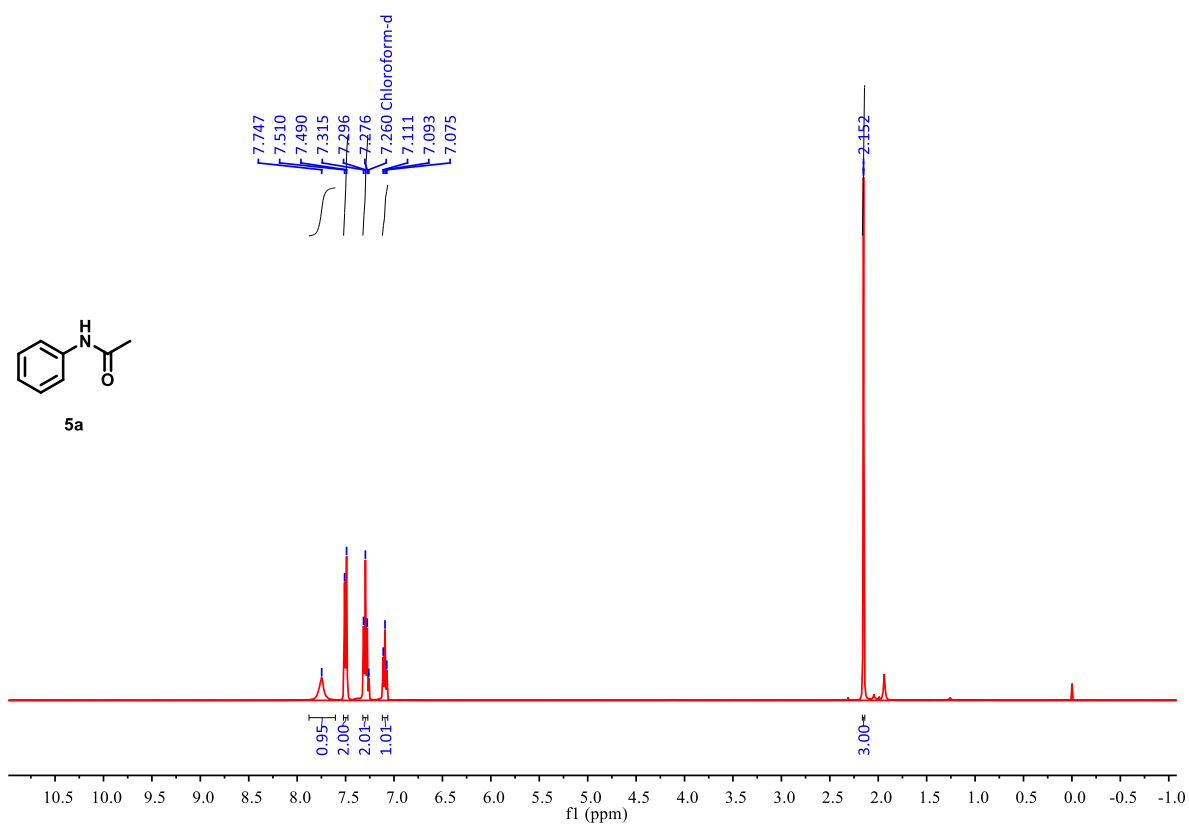

<sup>13</sup>C NMR, 101 MHz, CDCl<sub>3</sub>

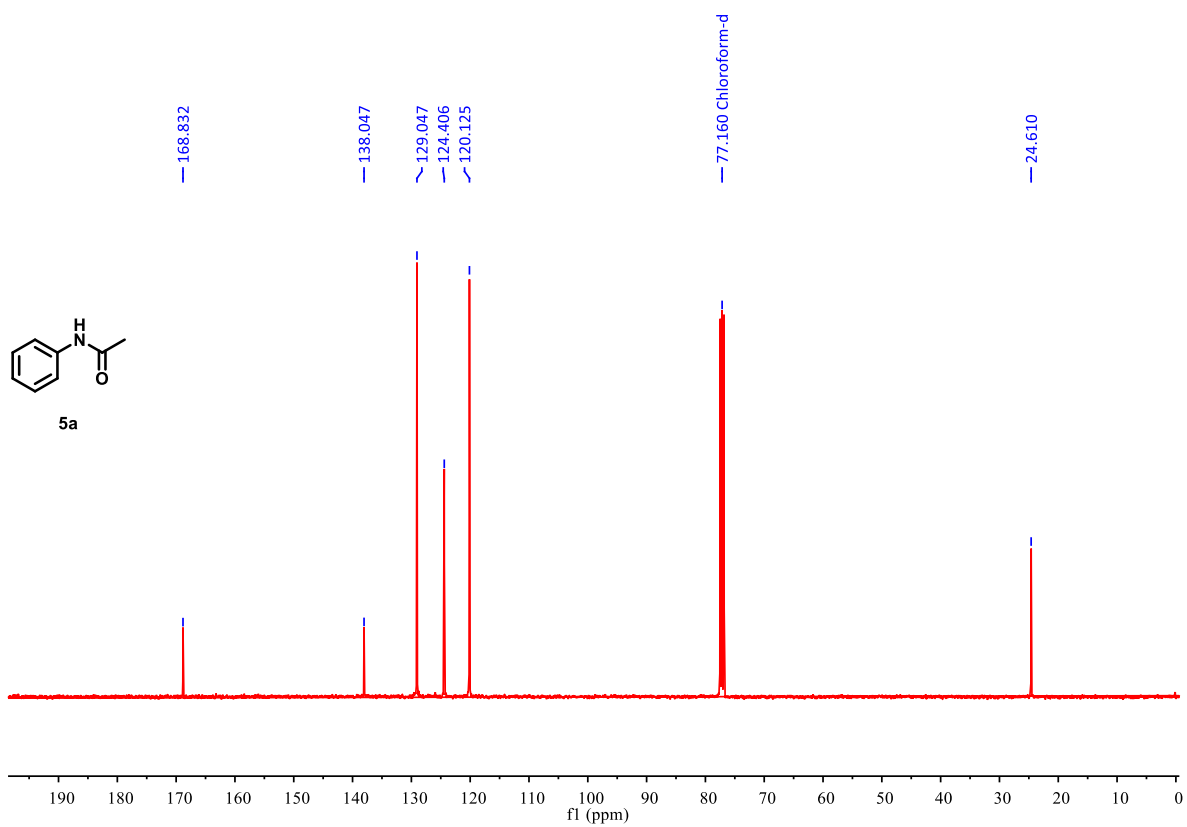

Supplement: d5ra09229a1.pdf [file d5ra09229a1.pdf]
